# Supplementary material for: Exploring common genetic contributors to neuroprotection from amyloid pathology
Source: PubMed Central journal article supplement (PMC9006043; doi:10.1093/braincomms/fcac066), 2022-03-17
Supplement: fcac066_supplementary_data.pdf [file fcac066_supplementary_data.pdf]

## Participants

The Alzheimer's Disease Neuroimaging Initiative (ADNI) database ([adni.loni.usc.edu](http://adni.loni.usc.edu)) was launched in 2003 as a public-private partnership, led by Principal Investigator Michael W. Weiner, MD. The primary goal of ADNI has been to test whether serial MRI, PET, other biological markers, and clinical and neuropsychological assessment can be combined to measure the progression of mild cognitive impairment (MCI) and early AD. ADNI enrolls participants who are 55 to 90 years of age ([www.adni-info.org](http://www.adni-info.org)). The Vanderbilt Memory and Aging Project (VMAP) was launched at Vanderbilt University Medical Center. The study enrolls individuals with MCI, as well as age-, sex-, and race-matched cognitively normal counterparts. Participants are excluded if they are not eligible for MRI or have a history of neurological or cardiovascular disease.<sup>1</sup> The Wisconsin Registry for Alzheimer's Prevention (WRAP) began at the University of Wisconsin-Madison in 2001. WRAP enrolls individuals who are cognitively normal, 40 to 65 years of age, have a parental history of AD, and an increased risk for the disease. In 2004, WRAP began recruitment of cognitively normal individuals without a self-reported parental history of AD.<sup>2</sup> The Biomarkers of Cognitive Decline Among Normal Individuals (BIOCARD) study is currently located at Johns Hopkins School of Medicine. BIOCARD enrolls participants who were middle-age and cognitively intact. The study is enriched for individuals who had a first-degree relative with AD.<sup>3</sup>

Data from the Mayo Clinic Study of Aging (MCSA) was used for replication analyses. The MCSA is a population-based prospective study of older adults residing in Olmsted County, Minnesota.<sup>4,5</sup> Individuals have been enrolled serially starting in 2004, with multimodal clinical and biomarker data obtained at longitudinal visits based on study protocols.

Consent for each participant was acquired by each longitudinal aging study independently. Each study is fully described elsewhere.

## Sex and Intracranial Volume Adjustment of Hippocampal Volume

First, all study cohorts were subset to individuals who were cognitively normal at the time of their first MRI scan. Using a linear regression, the slopes ( $\beta$ ) of the associations between ICV, sex, and total hippocampal volume and the interaction between ICV and sex (ICV x sex) on total hippocampal volume in cognitively normal individuals, were calculated.

$$\text{Total Hippocampal Volume} \sim \text{ICV} + \text{Sex} + \text{ICV} \times \text{Sex}$$

Hippocampal volume for all subjects was then adjusted for the above confounders by subtracting the mean-centered effects of ICV, sex, and ICV x sex from the total hippocampal volume. We performed this adjustment because ICV is associated with hippocampal volume, and ICV also strongly differs by sex<sup>6</sup>.

## **Mayo Clinic Study of Aging Genotype Quality Control**

GWAS data for 1783 MCSA participants was acquired using DNA from peripheral blood samples and via the Illumina Infinium Global Screening Array-24 v2.0. Standard SNP-level QC filters were applied using PLINK, including call rate  $\geq 95\%$ , Hardy-Weinberg Equilibrium ( $p \geq 1 \times 10^{-5}$ ), and MAF  $\geq 1\%$ . Subject-level QC filters included call rate  $\geq 98\%$ , sex checks versus clinical data, Caucasian ancestry determined through STRUCTURE version 2.3.4, and ensuring no cryptic first- or second-degree relatedness (PLINK identity by descent  $PI\_HAT < 0.25$ ). Genome-wide imputation was performed with the Michigan Imputation Server using Minimac version 4-1.0.2 and the HRC reference panel. Following additional post-imputation QC filters including SNP call rate  $\geq 95\%$ , sample call rate  $\geq 98\%$ , Hardy-Weinberg Equilibrium ( $p \geq 1 \times 10^{-6}$ ), MAF  $\geq 1\%$ , stringent imputation quality measure ( $r^2 \geq 0.8$ ), and removal of SNPs with duplicate or no identifying rs number, data was available for 6153814 SNPs and 1727 MCSA participants.<sup>7</sup>

## **MAGMA Gene Sets**

Gene sets for MAGMA analyses leveraged data from the Gene Ontology (GO) project,<sup>8</sup> Kyoto Encyclopedia of Genes and Genomes (KEGG),<sup>9-11</sup> REACTOME,<sup>12, 13</sup> BIOCARTA,<sup>14</sup> and the Protein Interaction Database (PID)<sup>15</sup> totaling 12,195 sets.

**Supplementary Table 1:** Summary of imputation and quality control measures performed on each dataset

| Dataset          | Platform                                                                                | Pre-QC      |               | Pre-imputation |               | Post-imputation |               |
|------------------|-----------------------------------------------------------------------------------------|-------------|---------------|----------------|---------------|-----------------|---------------|
|                  |                                                                                         | Sample size | # of variants | Sample size    | # of variants | Sample size     | # of variants |
| ADNI 1           | Illumina 610-Quad                                                                       | 757         | 620,901       | 666            | 536,557       | 666             | 6,577,704     |
| ADNI 2           | Illumina OmniExpress                                                                    | 432         | 730,525       | 430            | 641,075       | 430             | 6,662,117     |
| ADNI WGS         | Illumina Omni 2.5M<br>(WGS Platform)                                                    | 812         | 2,379,855     | 807            | 1,480,134     | 807             | 7,298,856     |
| ADNI<br>(merged) | (merge)                                                                                 | 1903        | 7,571,217     | N/A            | N/A           | 1,247           | 7,849,615     |
| BIOCARD          | Illumina OmniExpress                                                                    | 261         | 730,525       | 193            | 638,868       | 190             | 6,559,742     |
| WRAP             | Illumina Multi-Ethnic<br>Genotyping Array                                               | 1340        | 1,779,819     | 1198           | 898,220       | 1,198           | 10,499,994    |
| VMAP             | Illumina Infinium<br>Expanded Multi-Ethnic<br>Genotyping Array<br>(MEGA <sup>EX</sup> ) | 352         | 1,842,793     | 261            | 770,719       | 256             | 6,760,400     |

**Note:** Since genetic data for ADNI were obtained on multiple platforms, QC and imputation were completed on each set separately and were merged after post-imputation filters. For these merged sets, number of samples and variants immediately after merging and after additional filtering for overlap and relatedness are in the "Pre-QC" and "Post-imputation" columns respectively.

**Abbreviations:** ADNI=Alzheimer's Disease Neuroimaging Initiative; BIOCARD=Biomarkers of Cognitive Decline Among Normal Individuals cohort; WRAP=Wisconsin Registry for Alzheimer's Prevention; VMAP=Vanderbilt Memory and Aging Project

| <b>Supplementary Table 2: Summary of protocols for MRI acquisition by site</b>                                                                                                                                                                                                 |                                     |           |              |                                                          |
|--------------------------------------------------------------------------------------------------------------------------------------------------------------------------------------------------------------------------------------------------------------------------------|-------------------------------------|-----------|--------------|----------------------------------------------------------|
| Dataset                                                                                                                                                                                                                                                                        | Scanner Platform                    | Strength  | Image Weight | Protocol                                                 |
| ADNI 1                                                                                                                                                                                                                                                                         | Multiple (GE, Philips, and Siemens) | 1.5 Tesla | T1           | <a href="http://www.adni-info.org">www.adni-info.org</a> |
| ADNI-GO/ADNI-2                                                                                                                                                                                                                                                                 | Multiple (GE, Philips, and Siemens) | 3 Tesla   | T1           | <a href="http://www.adni-info.org">www.adni-info.org</a> |
| WRAP                                                                                                                                                                                                                                                                           | GE MR750                            | 3 Tesla   | T1           | 16                                                       |
| VMAP                                                                                                                                                                                                                                                                           | Philips Achieva                     | 3 Tesla   | T1           | 1                                                        |
| BIOCARD                                                                                                                                                                                                                                                                        | GE                                  | 1.5 Tesla | T1           | 17                                                       |
| <p><b>Abbreviations:</b> ADNI=Alzheimer's Disease Neuroimaging Initiative;<br/>         BIOCARD=Biomarkers of Cognitive Decline Among Normal Individuals cohort;<br/>         WRAP=Wisconsin Registry for Alzheimer's Prevention; VMAP=Vanderbilt Memory and Aging Project</p> |                                     |           |              |                                                          |

**Table S3.** Suggestive loci for the SNP x CSF AB42 interaction on baseline hippocampal volume; linear mixed-effects models.

| SNP           | predictor                               | beta        | se         | df   | t           | p           |
|---------------|-----------------------------------------|-------------|------------|------|-------------|-------------|
| rs62263260_T  | rs62263260_T:interval:std_mixture_ab42  | 0.03302265  | 0.00595026 | 2809 | 5.5497793   | 3.12717E-08 |
| rs11707826_T  | rs11707826_T:interval:std_mixture_ab42  | 0.03295566  | 0.00594666 | 2809 | 5.54187714  | 3.27005E-08 |
| rs10934626_T  | rs10934626_T:interval:std_mixture_ab42  | 0.03295566  | 0.00594666 | 2809 | 5.54187714  | 3.27005E-08 |
| rs4677869_T   | rs4677869_T:interval:std_mixture_ab42   | 0.03182185  | 0.00594324 | 2809 | 5.35429276  | 9.2828E-08  |
| rs2288678_G   | rs2288678_G:interval:std_mixture_ab42   | 0.03195757  | 0.00621294 | 2809 | 5.14370772  | 2.879E-07   |
| rs11706210_C  | rs11706210_C:interval:std_mixture_ab42  | 0.03103419  | 0.00620389 | 2809 | 5.00237522  | 6.0116E-07  |
| rs11707039_A  | rs11707039_A:interval:std_mixture_ab42  | 0.03103419  | 0.00620389 | 2809 | 5.00237522  | 6.0116E-07  |
| rs938591_C    | rs938591_C:interval:std_mixture_ab42    | 0.023229748 | 0.00467336 | 2809 | 4.98516511  | 6.56703E-07 |
| rs10833448_T  | rs10833448_T:interval:std_mixture_ab42  | 0.023225151 | 0.00467397 | 2809 | 4.97468278  | 6.92924E-07 |
| rs4677982_C   | rs4677982_C:interval:std_mixture_ab42   | 0.03066945  | 0.00617275 | 2809 | 4.96852271  | 7.151E-07   |
| rs4677983_A   | rs4677983_A:interval:std_mixture_ab42   | 0.03050867  | 0.00617145 | 2809 | 4.94351384  | 8.12364E-07 |
| rs4677984_T   | rs4677984_T:interval:std_mixture_ab42   | 0.03050867  | 0.00617145 | 2809 | 4.94351384  | 8.12364E-07 |
| rs4677870_C   | rs4677870_C:interval:std_mixture_ab42   | 0.03050867  | 0.00617145 | 2809 | 4.94351384  | 8.12364E-07 |
| rs10934625_C  | rs10934625_C:interval:std_mixture_ab42  | 0.03044451  | 0.00617403 | 2809 | 4.93105591  | 8.65455E-07 |
| rs35989119_C  | rs35989119_C:interval:std_mixture_ab42  | 0.03043541  | 0.00617418 | 2809 | 4.92946592  | 8.72467E-07 |
| rs4536170_C   | rs4536170_C:interval:std_mixture_ab42   | 0.02118637  | 0.00466847 | 2809 | 4.53818205  | 5.91252E-06 |
| rs1037731_G   | rs1037731_G:interval:std_mixture_ab42   | 0.02106634  | 0.00466543 | 2809 | 4.51540906  | 6.57982E-06 |
| rs963960_T    | rs963960_T:interval:std_mixture_ab42    | 0.02106634  | 0.00466543 | 2809 | 4.51540906  | 6.57982E-06 |
| rs4542368_T   | rs4542368_T:interval:std_mixture_ab42   | 0.02097454  | 0.00466555 | 2809 | 4.49561884  | 7.21773E-06 |
| rs12276382_C  | rs12276382_C:interval:std_mixture_ab42  | 0.02083416  | 0.00470447 | 2809 | 4.42858321  | 9.84778E-06 |
| rs7935097_T   | rs7935097_T:interval:std_mixture_ab42   | 0.02040312  | 0.00471351 | 2809 | 4.32864396  | 1.55276E-05 |
| rs4753405_T   | rs4753405_T:interval:std_mixture_ab42   | 0.02040312  | 0.00471351 | 2809 | 4.32864396  | 1.55276E-05 |
| rs116647170_T | rs116647170_T:interval:std_mixture_ab42 | 0.1071517   | 0.02478086 | 2809 | 4.323396988 | 1.58583E-05 |
| rs6483171_A   | rs6483171_A:interval:std_mixture_ab42   | 0.02035471  | 0.00470999 | 2809 | 4.32160241  | 1.60283E-05 |
| rs7944251_A   | rs7944251_A:interval:std_mixture_ab42   | 0.02035471  | 0.00470999 | 2809 | 4.32160241  | 1.60283E-05 |
| rs12576325_T  | rs12576325_T:interval:std_mixture_ab42  | 0.02016764  | 0.00471459 | 2809 | 4.2777051   | 1.95137E-05 |
| rs12786200_T  | rs12786200_T:interval:std_mixture_ab42  | 0.02016764  | 0.00471459 | 2809 | 4.2777051   | 1.95137E-05 |

|               |                                         |            |            |      |            |             |
|---------------|-----------------------------------------|------------|------------|------|------------|-------------|
| rs2212387_T   | rs2212387_T:interval:std_mixture_ab42   | 0.02016764 | 0.00471459 | 2809 | 4.2777051  | 1.95137E-05 |
| rs7934732_T   | rs7934732_T:interval:std_mixture_ab42   | 0.02016764 | 0.00471459 | 2809 | 4.2777051  | 1.95137E-05 |
| rs2054215_A   | rs2054215_A:interval:std_mixture_ab42   | 0.02009833 | 0.00471186 | 2809 | 4.26548089 | 2.06062E-05 |
| rs77107095_A  | rs77107095_A:interval:std_mixture_ab42  | -0.0424072 | 0.0099428  | 2809 | -4.2651125 | 2.064E-05   |
| rs112636864_A | rs112636864_A:interval:std_mixture_ab42 | -0.0424072 | 0.0099428  | 2809 | -4.2651125 | 2.064E-05   |
| rs113395363_T | rs113395363_T:interval:std_mixture_ab42 | -0.0424072 | 0.0099428  | 2809 | -4.2651125 | 2.064E-05   |
| rs74822708_A  | rs74822708_A:interval:std_mixture_ab42  | -0.0424072 | 0.0099428  | 2809 | -4.2651125 | 2.064E-05   |
| rs11120645_T  | rs11120645_T:interval:std_mixture_ab42  | -0.0424072 | 0.0099428  | 2809 | -4.2651125 | 2.064E-05   |
| rs113393658_A | rs113393658_A:interval:std_mixture_ab42 | -0.0426389 | 0.01001382 | 2809 | -4.2580066 | 2.13026E-05 |
| rs146752822_A | rs146752822_A:interval:std_mixture_ab42 | -0.0426389 | 0.01001382 | 2809 | -4.2580066 | 2.13026E-05 |
| rs12132798_G  | rs12132798_G:interval:std_mixture_ab42  | -0.0426389 | 0.01001382 | 2809 | -4.2580066 | 2.13026E-05 |
| rs12577025_A  | rs12577025_A:interval:std_mixture_ab42  | 0.02004557 | 0.00471111 | 2809 | 4.25495344 | 2.15935E-05 |
| rs10501774_A  | rs10501774_A:interval:std_mixture_ab42  | 0.02004557 | 0.00471111 | 2809 | 4.25495344 | 2.15935E-05 |
| rs1320636_A   | rs1320636_A:interval:std_mixture_ab42   | 0.02004557 | 0.00471111 | 2809 | 4.25495344 | 2.15935E-05 |
| rs12144789_T  | rs12144789_T:interval:std_mixture_ab42  | -0.0422474 | 0.0099379  | 2809 | -4.2511337 | 2.19627E-05 |
| rs12123296_T  | rs12123296_T:interval:std_mixture_ab42  | -0.0423437 | 0.01001321 | 2809 | -4.2287851 | 2.42464E-05 |
| rs12126534_A  | rs12126534_A:interval:std_mixture_ab42  | -0.0423437 | 0.01001321 | 2809 | -4.2287851 | 2.42464E-05 |
| rs112735413_A | rs112735413_A:interval:std_mixture_ab42 | -0.0423437 | 0.01001321 | 2809 | -4.2287851 | 2.42464E-05 |
| rs75410548_C  | rs75410548_C:interval:std_mixture_ab42  | -0.0423437 | 0.01001321 | 2809 | -4.2287851 | 2.42464E-05 |
| rs76992333_T  | rs76992333_T:interval:std_mixture_ab42  | -0.0423437 | 0.01001321 | 2809 | -4.2287851 | 2.42464E-05 |
| rs16917214_T  | rs16917214_T:interval:std_mixture_ab42  | 0.01988752 | 0.00471024 | 2809 | 4.2221912  | 2.49623E-05 |
| rs16917218_A  | rs16917218_A:interval:std_mixture_ab42  | 0.01988752 | 0.00471024 | 2809 | 4.2221912  | 2.49623E-05 |
| rs74592637_A  | rs74592637_A:interval:std_mixture_ab42  | -0.0566469 | 0.01346481 | 2809 | -4.2070333 | 2.6685E-05  |
| rs2371519_G   | rs2371519_G:interval:std_mixture_ab42   | -0.0566469 | 0.01346481 | 2809 | -4.2070333 | 2.6685E-05  |
| rs11108857_C  | rs11108857_C:interval:std_mixture_ab42  | -0.0566469 | 0.01346481 | 2809 | -4.2070333 | 2.6685E-05  |
| rs4314861_G   | rs4314861_G:interval:std_mixture_ab42   | -0.0414655 | 0.00992167 | 2809 | -4.1792829 | 3.01359E-05 |
| rs7416880_A   | rs7416880_A:interval:std_mixture_ab42   | -0.0414655 | 0.00992167 | 2809 | -4.1792829 | 3.01359E-05 |
| rs12129576_C  | rs12129576_C:interval:std_mixture_ab42  | -0.0414655 | 0.00992167 | 2809 | -4.1792829 | 3.01359E-05 |
| rs12132110_A  | rs12132110_A:interval:std_mixture_ab42  | -0.0414655 | 0.00992167 | 2809 | -4.1792829 | 3.01359E-05 |
| rs74447991_T  | rs74447991_T:interval:std_mixture_ab42  | -0.0414655 | 0.00992167 | 2809 | -4.1792829 | 3.01359E-05 |
| rs12140781_A  | rs12140781_A:interval:std_mixture_ab42  | -0.0414655 | 0.00992167 | 2809 | -4.1792829 | 3.01359E-05 |
| rs12137445_A  | rs12137445_A:interval:std_mixture_ab42  | -0.0414297 | 0.00992011 | 2809 | -4.176332  | 3.05269E-05 |
| rs12139361_A  | rs12139361_A:interval:std_mixture_ab42  | -0.0414297 | 0.00992011 | 2809 | -4.176332  | 3.05269E-05 |
| rs4453013_A   | rs4453013_A:interval:std_mixture_ab42   | -0.0414297 | 0.00992011 | 2809 | -4.176332  | 3.05269E-05 |

|               |                                         |            |            |      |            |             |
|---------------|-----------------------------------------|------------|------------|------|------------|-------------|
| rs12138094_A  | rs12138094_A:interval:std_mixture_ab42  | -0.0414297 | 0.00992011 | 2809 | -4.176332  | 3.05269E-05 |
| rs79937377_A  | rs79937377_A:interval:std_mixture_ab42  | -0.0414297 | 0.00992011 | 2809 | -4.176332  | 3.05269E-05 |
| rs12141340_C  | rs12141340_C:interval:std_mixture_ab42  | -0.0414297 | 0.00992011 | 2809 | -4.176332  | 3.05269E-05 |
| rs11120650_T  | rs11120650_T:interval:std_mixture_ab42  | -0.0414297 | 0.00992011 | 2809 | -4.176332  | 3.05269E-05 |
| rs1416842_A   | rs1416842_A:interval:std_mixture_ab42   | -0.0416625 | 0.00999137 | 2809 | -4.1698475 | 3.1403E-05  |
| rs79789651_C  | rs79789651_C:interval:std_mixture_ab42  | -0.0416625 | 0.00999137 | 2809 | -4.1698475 | 3.1403E-05  |
| rs12117370_A  | rs12117370_A:interval:std_mixture_ab42  | -0.0416576 | 0.00999132 | 2809 | -4.1693784 | 3.14673E-05 |
| rs12409223_G  | rs12409223_G:interval:std_mixture_ab42  | -0.0416576 | 0.00999132 | 2809 | -4.1693784 | 3.14673E-05 |
| rs112141149_G | rs112141149_G:interval:std_mixture_ab42 | -0.0416576 | 0.00999132 | 2809 | -4.1693784 | 3.14673E-05 |
| rs12132976_A  | rs12132976_A:interval:std_mixture_ab42  | -0.0412577 | 0.00991514 | 2809 | -4.1610836 | 3.26252E-05 |
| rs12135237_A  | rs12135237_A:interval:std_mixture_ab42  | -0.0412577 | 0.00991514 | 2809 | -4.1610836 | 3.26252E-05 |
| rs12133551_C  | rs12133551_C:interval:std_mixture_ab42  | -0.0412577 | 0.00991514 | 2809 | -4.1610836 | 3.26252E-05 |
| rs4651332_T   | rs4651332_T:interval:std_mixture_ab42   | 0.02111807 | 0.00508223 | 2809 | 4.15527614 | 3.34598E-05 |
| rs41277194_C  | rs41277194_C:interval:std_mixture_ab42  | -0.0413826 | 0.00999094 | 2809 | -4.1420168 | 3.54421E-05 |
| rs12402107_G  | rs12402107_G:interval:std_mixture_ab42  | -0.0413826 | 0.00999094 | 2809 | -4.1420168 | 3.54421E-05 |
| rs76191410_A  | rs76191410_A:interval:std_mixture_ab42  | -0.0413826 | 0.00999094 | 2809 | -4.1420168 | 3.54421E-05 |
| rs12126346_C  | rs12126346_C:interval:std_mixture_ab42  | -0.0413826 | 0.00999094 | 2809 | -4.1420168 | 3.54421E-05 |
| rs1934430_T   | rs1934430_T:interval:std_mixture_ab42   | -0.0413779 | 0.00999086 | 2809 | -4.1415744 | 3.55102E-05 |
| rs7521601_T   | rs7521601_T:interval:std_mixture_ab42   | 0.02085043 | 0.00512864 | 2809 | 4.06548853 | 4.92483E-05 |
| rs7532616_A   | rs7532616_A:interval:std_mixture_ab42   | 0.02085043 | 0.00512864 | 2809 | 4.06548853 | 4.92483E-05 |
| rs6425052_C   | rs6425052_C:interval:std_mixture_ab42   | 0.02085043 | 0.00512864 | 2809 | 4.06548853 | 4.92483E-05 |
| rs6687896_G   | rs6687896_G:interval:std_mixture_ab42   | 0.02085043 | 0.00512864 | 2809 | 4.06548853 | 4.92483E-05 |
| rs7541946_C   | rs7541946_C:interval:std_mixture_ab42   | 0.02085043 | 0.00512864 | 2809 | 4.06548853 | 4.92483E-05 |
| rs12137796_T  | rs12137796_T:interval:std_mixture_ab42  | -0.0416803 | 0.01026162 | 2809 | -4.0617644 | 5.0036E-05  |
| rs141173782_T | rs141173782_T:interval:std_mixture_ab42 | -0.0416803 | 0.01026162 | 2809 | -4.0617644 | 5.0036E-05  |
| rs12406554_T  | rs12406554_T:interval:std_mixture_ab42  | -0.0416803 | 0.01026162 | 2809 | -4.0617644 | 5.0036E-05  |
| rs12129954_C  | rs12129954_C:interval:std_mixture_ab42  | -0.0416803 | 0.01026162 | 2809 | -4.0617644 | 5.0036E-05  |
| rs4651334_A   | rs4651334_A:interval:std_mixture_ab42   | 0.02060012 | 0.00507335 | 2809 | 4.06045875 | 5.0315E-05  |
| rs7196791_T   | rs7196791_T:interval:std_mixture_ab42   | -0.0244444 | 0.00608769 | 2809 | -4.015383  | 6.09036E-05 |
| rs10732978_A  | rs10732978_A:interval:std_mixture_ab42  | 0.02052538 | 0.00512647 | 2809 | 4.0038055  | 6.3946E-05  |
| rs6688584_T   | rs6688584_T:interval:std_mixture_ab42   | 0.02052538 | 0.00512647 | 2809 | 4.0038055  | 6.3946E-05  |
| rs10911934_A  | rs10911934_A:interval:std_mixture_ab42  | 0.02052538 | 0.00512647 | 2809 | 4.0038055  | 6.3946E-05  |
| rs10737270_T  | rs10737270_T:interval:std_mixture_ab42  | 0.02052538 | 0.00512647 | 2809 | 4.0038055  | 6.3946E-05  |
| rs10798060_C  | rs10798060_C:interval:std_mixture_ab42  | 0.02052538 | 0.00512647 | 2809 | 4.0038055  | 6.3946E-05  |

|               |                                         |            |            |      |            |             |
|---------------|-----------------------------------------|------------|------------|------|------------|-------------|
| rs6685652_C   | rs6685652_C:interval:std_mixture_ab42   | 0.02052538 | 0.00512647 | 2809 | 4.0038055  | 6.3946E-05  |
| rs10752977_G  | rs10752977_G:interval:std_mixture_ab42  | 0.02052538 | 0.00512647 | 2809 | 4.0038055  | 6.3946E-05  |
| rs10752978_A  | rs10752978_A:interval:std_mixture_ab42  | 0.02052538 | 0.00512647 | 2809 | 4.0038055  | 6.3946E-05  |
| rs10752979_A  | rs10752979_A:interval:std_mixture_ab42  | 0.02052538 | 0.00512647 | 2809 | 4.0038055  | 6.3946E-05  |
| rs10798061_A  | rs10798061_A:interval:std_mixture_ab42  | 0.02052538 | 0.00512647 | 2809 | 4.0038055  | 6.3946E-05  |
| rs10911933_C  | rs10911933_C:interval:std_mixture_ab42  | 0.0205026  | 0.00512904 | 2809 | 3.99735638 | 6.57027E-05 |
| rs12141208_C  | rs12141208_C:interval:std_mixture_ab42  | -0.0406683 | 0.01023884 | 2809 | -3.9719604 | 7.30743E-05 |
| rs113042941_C | rs113042941_C:interval:std_mixture_ab42 | -0.0406683 | 0.01023884 | 2809 | -3.9719604 | 7.30743E-05 |
| rs79825305_A  | rs79825305_A:interval:std_mixture_ab42  | -0.0406627 | 0.01023884 | 2809 | -3.9714151 | 7.32409E-05 |
| rs75574076_T  | rs75574076_T:interval:std_mixture_ab42  | -0.0406473 | 0.01023685 | 2809 | -3.9706838 | 7.34648E-05 |
| rs112167269_G | rs112167269_G:interval:std_mixture_ab42 | -0.0402616 | 0.01015192 | 2809 | -3.9659125 | 7.49418E-05 |
| rs12130528_C  | rs12130528_C:interval:std_mixture_ab42  | -0.0402616 | 0.01015192 | 2809 | -3.9659125 | 7.49418E-05 |
| rs6425053_A   | rs6425053_A:interval:std_mixture_ab42   | 0.02022138 | 0.00518655 | 2809 | 3.89881194 | 9.89279E-05 |
| rs2205897_T   | rs2205897_T:interval:std_mixture_ab42   | 0.01972771 | 0.0050669  | 2809 | 3.89344457 | 0.000101131 |
| rs10489407_A  | rs10489407_A:interval:std_mixture_ab42  | 0.01966908 | 0.00506511 | 2809 | 3.88325252 | 0.000105444 |
| rs4130590_A   | rs4130590_A:interval:std_mixture_ab42   | -0.0143884 | 0.00389459 | 2809 | -3.6944712 | 0.000224548 |
| rs7041940_T   | rs7041940_T:interval:std_mixture_ab42   | -0.0143884 | 0.00389459 | 2809 | -3.6944712 | 0.000224548 |
| rs6478770_T   | rs6478770_T:interval:std_mixture_ab42   | -0.0142242 | 0.0038977  | 2809 | -3.6493869 | 0.000267654 |
| rs10279772_A  | rs10279772_A:interval:std_mixture_ab42  | -0.0163002 | 0.00451725 | 2809 | -3.6084391 | 0.000313421 |
| rs10280089_A  | rs10280089_A:interval:std_mixture_ab42  | -0.0163002 | 0.00451725 | 2809 | -3.6084391 | 0.000313421 |
| rs1363073_T   | rs1363073_T:interval:std_mixture_ab42   | 0.01740418 | 0.00499703 | 2809 | 3.4829033  | 0.000503585 |
| rs3096644_T   | rs3096644_T:interval:std_mixture_ab42   | -0.0150429 | 0.00437935 | 2809 | -3.4349683 | 0.000601218 |
| rs3110609_C   | rs3110609_C:interval:std_mixture_ab42   | -0.0148135 | 0.0044032  | 2809 | -3.3642604 | 0.000777779 |



| <b>Supplementary Table 4: rs62263260 x <math>\beta</math>-Amyloid results stratified by diagnosis and aging study</b> |     |                                        |        |        |         |
|-----------------------------------------------------------------------------------------------------------------------|-----|----------------------------------------|--------|--------|---------|
| <b>Sample stratified by diagnosis</b>                                                                                 |     |                                        |        |        |         |
| Sample                                                                                                                | N   | % rs62263260 minor allele (T) carriers | B      | SE     | P value |
| Normal Cognition                                                                                                      | 490 | 19.8                                   | 0.0127 | 0.0037 | 0.0006  |
| MCI                                                                                                                   | 475 | 22.9                                   | 0.0174 | 0.0046 | 0.0002  |
| AD                                                                                                                    | 100 | 28.0                                   | 0.0188 | 0.0134 | 0.1657  |
| <b>Sample stratified by aging study</b>                                                                               |     |                                        |        |        |         |
| Sample                                                                                                                | N   | % rs62263260 minor allele (T) carriers | B      | SE     | P value |
| ADNI                                                                                                                  | 702 | 22.5                                   | 0.0102 | 0.0036 | 0.0041  |
| VMAP                                                                                                                  | 126 | 20.6                                   | 0.0322 | 0.0069 | 8.07e-6 |
| WRAP                                                                                                                  | 97  | 24.7                                   | 0.0053 | 0.0150 | 0.722   |
| BIOCARD                                                                                                               | 140 | 18.6                                   | 0.0119 | 0.0121 | 0.328   |

| <b>Supplementary Table 5: All coefficients from rs62263260 x <math>\beta</math>-Amyloid model when additional age x dataset covariate</b> |         |        |            |
|-------------------------------------------------------------------------------------------------------------------------------------------|---------|--------|------------|
| <u>Model:</u> Annual change in HV ~ age at baseline MRI + sex + PC1-3 + rs62263260*CSF A $\beta$ 42 + age at baseline MRI x dataset       |         |        |            |
| Predictor                                                                                                                                 | B       | SE     | P value    |
| Intercept                                                                                                                                 | 0.0128  | 0.03   | 0.67       |
| Sex                                                                                                                                       | -0.0019 | 0.005  | 0.673      |
| Age at baseline MRI                                                                                                                       | -0.002  | 0.0004 | 7.88e-7    |
| PC1                                                                                                                                       | 0.0418  | 0.113  | 0.711      |
| PC2                                                                                                                                       | -0.023  | 0.127  | 0.856      |
| PC3                                                                                                                                       | -0.057  | 0.109  | 0.604      |
| rs62263260                                                                                                                                | 0.0147  | 0.006  | 0.015      |
| CSF A $\beta$ 42                                                                                                                          | 0.013   | 0.002  | < 2.00e-16 |
| BIOCARD                                                                                                                                   | -0.136  | 0.057  | 0.016      |
| VMAP                                                                                                                                      | 0.114   | 0.0797 | 0.151      |
| WRAP                                                                                                                                      | 0.069   | 0.085  | 0.413      |
| rs62263260 x CSF A $\beta$ 42                                                                                                             | 0.0151  | 0.003  | 7.32e-8    |
| Age x BIOCARD                                                                                                                             | 0.0025  | 0.0009 | 0.0045     |
| Age x VMAP                                                                                                                                | -0.0015 | 0.001  | 0.168      |
| Age x WRAP                                                                                                                                | -0.0002 | 0.001  | 0.889      |

| <b>Supplementary Table 6: Dataset characteristics by analysis (CSF and PET)</b> |                                   |                  |                |
|---------------------------------------------------------------------------------|-----------------------------------|------------------|----------------|
|                                                                                 | Combined CSF Dataset <sup>a</sup> | CSF GWAS Dataset | ADNI PET Total |
| N                                                                               | 1537                              | 1065             | 667            |
| Age at baseline                                                                 | 70.3 ± 8.8                        | 70.8±8.7         | 73.4±7.1       |
| Sex, % female                                                                   | 48%                               | 47%              | 44%            |
| % APOE-ε4 carriers                                                              | 42%                               | 40%              | 41%            |
| % APOE-ε2 carriers                                                              | 10%                               | 10%              | 10%            |
| NC (persons)                                                                    | 734                               | 490              | 220            |
| MCI (persons)                                                                   | 637                               | 475              | 398            |
| AD (persons)                                                                    | 176                               | 100              | 49             |
| Std. CSF Aβ42                                                                   | -1.31±1.7                         | -1.34±1.7        | 2.53±3.07      |
| Neuroimaging Measurements (MRI)                                                 |                                   |                  |                |
| Std. Hippocampal Volume                                                         | -0.55±1.3                         | -0.58±1.3        | -0.62±1.3      |
| Std. Hippocampal Vol. Slopes                                                    | -0.13±0.1                         | -0.14±0.1        | -0.16±0.1      |

**Table S7.** Coloc results for genes within the 1Mb region of rs62263260; only SEMA5B were tested in GTEx tissues because rs62263260 (or its associated SNPs) was not an eQTL for any other gene in GTEx. In GTEx significance is  $p < 0.0011$

| Sieberts et al, 2020: AMP-AD Cortex Meta-Analysis eQTL, n=1433 |            |                             |        |          |              |                    |                    |  |  |
|----------------------------------------------------------------|------------|-----------------------------|--------|----------|--------------|--------------------|--------------------|--|--|
| Gene                                                           | SNP        | eQTL pvalue (FDR-corrected) | PP3    | PP4      | Best-fit SNP | BP Position (hg38) | Best-fit SNP.PP.H4 |  |  |
| SEMA5B                                                         | rs62263260 | 9.31E-07                    | 0.9980 | 6.33E-05 | rs2276782    | 3:122913049        | 0.8688             |  |  |
| CCDC58                                                         | rs62263260 | 0.7853                      | 0.346  | 0.0338   | rs62263260   | 3:122956480        | 0.2711             |  |  |
| FAM162A                                                        | rs62263260 | 0.4372                      | 0.175  | 0.106    | rs10934626   | 3:122957676        | 0.3026             |  |  |
| WDR5B                                                          | rs62263260 | 0.3234                      | 0.9980 | 8.93E-05 | rs6438741    | 3:122562494        | 0.2564             |  |  |
| KPNA1                                                          | rs62263260 | 0.9854                      | 0.9980 | 3.32E-05 | rs6771095    | 3:122472888        | 0.1279             |  |  |
| PARP9                                                          | rs62263260 | 0.9930                      | 0.9980 | 5.51E-05 | rs9872708    | 3:122523960        | 0.0570             |  |  |
| DTX3L                                                          | rs62263260 | 0.8757                      | 0.136  | 0.0347   | rs62263260   | 3:122956480        | 0.2790             |  |  |
| PARP14                                                         | rs62263260 | 0.9436                      | 0.9980 | 6.01E-05 | rs10804558   | 3:122826566        | 0.2284             |  |  |
| HSPBAP1                                                        | rs62263260 | 0.7977                      | 0.9980 | 5.83E-05 | rs2276775    | 3:122927887        | 0.9914             |  |  |
| DIRC2                                                          | rs62263260 | 0.0680                      | 0.9960 | 0.0013   | rs2276781    | 3:122913589        | 0.1711             |  |  |
| PDIAS                                                          | rs62263260 | 0.8578                      | 0.449  | 0.0247   | rs62263260   | 3:122956480        | 0.2599             |  |  |
| SEC22A                                                         | rs62263260 | 0.5753                      | 0.9970 | 1.31E-04 | rs62263260   | 3:122956480        | 0.1934             |  |  |
| ADCY5                                                          | rs62263260 | 0.9027                      | 0.187  | 0.0484   | rs10934626   | 3:122957676        | 0.1830             |  |  |
| HACD2                                                          | rs62263260 | 0.8443                      | 0.205  | 0.0353   | rs62263260   | 3:122956480        | 0.2718             |  |  |
| MYLK                                                           | rs62263260 | 0.9457                      | 0.139  | 0.0334   | rs62263260   | 3:122956480        | 0.2482             |  |  |
| CCDC14                                                         | rs62263260 | 0.8065                      | 0.278  | 0.0363   | rs62263260   | 3:122956480        | 0.2636             |  |  |
| GTEx v8 - Esophagus Muscularis, n=465                          |            |                             |        |          |              |                    |                    |  |  |
| Gene                                                           | SNP        | eQTL p-value (uncorrected)  | PP3    | PP4      | Best-fit SNP | BP Position (hg38) | Best-fit SNP.PP.H4 |  |  |
| SEMA5B                                                         | rs62263260 | 0.0000019                   | 0.0020 | 0.9950   | rs10934626   | 3:122957676        | 0.4187             |  |  |
| GTEx v8 - Testis, n=368                                        |            |                             |        |          |              |                    |                    |  |  |
| Gene                                                           | SNP        | eQTL p-value (uncorrected)  | PP3    | PP4      | Best-fit SNP | BP Position (hg38) | Best-fit SNP.PP.H4 |  |  |
| SEMA5B                                                         | rs10934626 | 0.000095                    | 0.9890 | 0.0064   | rs10934626   | 3:122957676        | 0.4900             |  |  |

GTEx v8 - Brain Anterior Cingulate Cortex BA24, n=147

| Gene   | SNP        | eQTL p-value (uncorrected) | PP3      | PP4    | Best-fit SNP | BP Position (hg38) | Best-fit SNP.PP.H4 |
|--------|------------|----------------------------|----------|--------|--------------|--------------------|--------------------|
| SEMA5B | rs62263260 | 0.00048                    | 9.39E-04 | 0.0267 | rs16833588   | 3:122857345        | 1.20E-05           |

**Supplementary Table 8: Breakdown of combined GWAS dataset by cohort**

|                       | ADNI      | VMAP      | BIOCARD   | WRAP      | Total     | P value |
|-----------------------|-----------|-----------|-----------|-----------|-----------|---------|
| N                     | 702       | 126       | 140       | 97        | 1065      | <0.001  |
| %Female               | 44%       | 31%       | 61%       | 65%       | 47%       | <0.001  |
| Age, years            | 73.6±7.1  | 73.0±6.4  | 60.8±7.7  | 61.7±5.7  | 70.8±8.7  | <0.001  |
| %APOE-ε4 Carriers     | 43%       | 33%       | 35%       | 38%       | 40%       | 0.059   |
| %APOE-ε2 Carriers     | 10%       | 10%       | 11%       | 14%       | 10%       | 0.474   |
| Standardized Aβ Value | -1.55±1.6 | -1.73±2.0 | -0.45±1.4 | -0.55±1.4 | -1.34±1.7 | <0.001  |
| Hippocampal Volume    | -0.81±1.4 | -0.43±1.3 | 0.001±1.0 | 0.09±1.0  | -0.58±1.3 | <0.001  |
| Hippocampal Slopes    | -0.15±0.8 | -0.15±0.1 | -0.09±0.1 | -0.06±0.1 | -0.14±0.1 | <0.001  |
| Number of Visits      | 4.04±1.94 | 2.97±0.90 | 2.29±1.35 | 3.59±1.26 | 3.64±1.83 | <0.001  |

**Table S9.** Suggestive loci for the SNP x CSF AB42 interaction on baseline hippocampal volume.

| CHR | SNP         | BP        | AL | TEST                 | N    | Beta    | SE      | U95     | U95      | T-STAT | P        |
|-----|-------------|-----------|----|----------------------|------|---------|---------|---------|----------|--------|----------|
| 2   | rs72792463  | 29661158  | G  | ADDxstd_mixture_ab42 | 1065 | -0.1942 | 0.04373 | -0.28   | -0.1085  | -4.442 | 9.86E-06 |
| 2   | rs55902725  | 71694837  | G  | ADDxstd_mixture_ab42 | 1065 | 0.2373  | 0.05196 | 0.1354  | 0.3391   | 4.566  | 5.54E-06 |
| 3   | rs814752    | 65783033  | T  | ADDxstd_mixture_ab42 | 1065 | -0.1669 | 0.03652 | -0.2385 | -0.09536 | -4.571 | 5.43E-06 |
| 5   | rs168660    | 154715368 | G  | ADDxstd_mixture_ab42 | 1065 | 0.1659  | 0.03687 | 0.0936  | 0.2381   | 4.499  | 7.59E-06 |
| 5   | rs1820796   | 154734068 | C  | ADDxstd_mixture_ab42 | 1065 | 0.1659  | 0.03687 | 0.0936  | 0.2381   | 4.499  | 7.59E-06 |
| 5   | rs1564800   | 154761128 | A  | ADDxstd_mixture_ab42 | 1065 | 0.1775  | 0.03717 | 0.1046  | 0.2504   | 4.775  | 2.05E-06 |
| 6   | rs77207148  | 139949556 | A  | ADDxstd_mixture_ab42 | 1065 | -0.3101 | 0.06289 | -0.4333 | -0.1868  | -4.931 | 9.52E-07 |
| 6   | rs74419807  | 139950129 | C  | ADDxstd_mixture_ab42 | 1065 | -0.3101 | 0.06289 | -0.4333 | -0.1868  | -4.931 | 9.52E-07 |
| 6   | rs79140486  | 139952778 | A  | ADDxstd_mixture_ab42 | 1065 | -0.3101 | 0.06289 | -0.4333 | -0.1868  | -4.931 | 9.52E-07 |
| 6   | rs2185921   | 139955081 | A  | ADDxstd_mixture_ab42 | 1065 | -0.3096 | 0.06242 | -0.432  | -0.1873  | -4.96  | 8.21E-07 |
| 6   | rs116083533 | 139956288 | A  | ADDxstd_mixture_ab42 | 1065 | -0.2904 | 0.06259 | -0.413  | -0.1677  | -4.639 | 3.94E-06 |
| 6   | rs1527033   | 24889912  | T  | ADDxstd_mixture_ab42 | 1065 | 0.1444  | 0.03157 | 0.08256 | 0.2063   | 4.575  | 5.32E-06 |
| 8   | rs2320780   | 24890137  | G  | ADDxstd_mixture_ab42 | 1065 | 0.1434  | 0.03159 | 0.08149 | 0.2053   | 4.539  | 6.29E-06 |
| 8   | rs4872283   | 24892440  | G  | ADDxstd_mixture_ab42 | 1065 | 0.1436  | 0.03154 | 0.08176 | 0.2054   | 4.552  | 5.94E-06 |
| 8   | rs4425762   | 24892833  | C  | ADDxstd_mixture_ab42 | 1065 | 0.1436  | 0.03154 | 0.08176 | 0.2054   | 4.552  | 5.94E-06 |
| 8   | rs2320782   | 24915220  | T  | ADDxstd_mixture_ab42 | 1065 | 0.1455  | 0.03146 | 0.08381 | 0.2071   | 4.624  | 4.23E-06 |
| 8   | rs11135840  | 24924178  | A  | ADDxstd_mixture_ab42 | 1065 | 0.1549  | 0.03111 | 0.09396 | 0.2159   | 4.98   | 7.42E-07 |
| 8   | rs7017203   | 24925058  | G  | ADDxstd_mixture_ab42 | 1065 | 0.1549  | 0.03111 | 0.09396 | 0.2159   | 4.98   | 7.42E-07 |
| 8   | rs9314297   | 24925366  | C  | ADDxstd_mixture_ab42 | 1065 | 0.1539  | 0.03114 | 0.09289 | 0.215    | 4.943  | 8.96E-07 |
| 9   | rs404479    | 23479588  | T  | ADDxstd_mixture_ab42 | 1065 | 0.1352  | 0.02943 | 0.0775  | 0.1929   | 4.593  | 4.89E-06 |
| 17  | rs986993    | 26187576  | A  | ADDxstd_mixture_ab42 | 1065 | -0.1514 | 0.034   | -0.218  | -0.08476 | -4.453 | 9.35E-06 |
| 17  | rs7220473   | 26194116  | T  | ADDxstd_mixture_ab42 | 1065 | -0.1558 | 0.03383 | -0.2221 | -0.08953 | -4.606 | 4.60E-06 |
| 19  | rs77105559  | 15687082  | A  | ADDxstd_mixture_ab42 | 1065 | -0.3966 | 0.08879 | -0.5706 | -0.2226  | -4.467 | 8.78E-06 |
| 19  | rs114237593 | 15687203  | C  | ADDxstd_mixture_ab42 | 1065 | -0.3966 | 0.08879 | -0.5706 | -0.2226  | -4.467 | 8.78E-06 |
| 19  | rs77287595  | 15688045  | T  | ADDxstd_mixture_ab42 | 1065 | -0.3966 | 0.08879 | -0.5706 | -0.2226  | -4.467 | 8.78E-06 |
| 19  | rs74978423  | 15693290  | C  | ADDxstd_mixture_ab42 | 1065 | -0.3989 | 0.0884  | -0.5722 | -0.2257  | -4.513 | 7.13E-06 |
| 19  | rs74701558  | 15693707  | G  | ADDxstd_mixture_ab42 | 1065 | -0.3989 | 0.0884  | -0.5722 | -0.2257  | -4.513 | 7.13E-06 |
| 19  | rs115557777 | 15693920  | T  | ADDxstd_mixture_ab42 | 1065 | -0.3989 | 0.0884  | -0.5722 | -0.2257  | -4.513 | 7.13E-06 |
| 19  | rs16980583  | 15695122  | A  | ADDxstd_mixture_ab42 | 1065 | -0.3989 | 0.0884  | -0.5722 | -0.2257  | -4.513 | 7.13E-06 |
| 19  | rs114636154 | 15695242  | A  | ADDxstd_mixture_ab42 | 1065 | -0.3989 | 0.0884  | -0.5722 | -0.2257  | -4.513 | 7.13E-06 |
| 19  | rs148622580 | 15696277  | T  | ADDxstd_mixture_ab42 | 1065 | -0.3989 | 0.0884  | -0.5722 | -0.2257  | -4.513 | 7.13E-06 |
| 19  | rs16980587  | 15697034  | C  | ADDxstd_mixture_ab42 | 1065 | -0.3989 | 0.0884  | -0.5722 | -0.2257  | -4.513 | 7.13E-06 |
| 19  | rs283815    | 45390333  | G  | ADDxstd_mixture_ab42 | 1065 | 0.157   | 0.03382 | 0.09068 | 0.2233   | 4.641  | 3.90E-06 |
| 19  | rs184017    | 45394969  | G  | ADDxstd_mixture_ab42 | 1065 | 0.1536  | 0.0338  | 0.08737 | 0.2199   | 4.545  | 6.14E-06 |
| 19  | rs157581    | 45395714  | C  | ADDxstd_mixture_ab42 | 1065 | 0.1535  | 0.0338  | 0.08723 | 0.2197   | 4.541  | 6.25E-06 |
| 19  | rs157582    | 45396219  | T  | ADDxstd_mixture_ab42 | 1065 | 0.155   | 0.03382 | 0.08867 | 0.2212   | 4.582  | 5.16E-06 |
| 20  | rs1884197   | 12872365  | T  | ADDxstd_mixture_ab42 | 1065 | -0.1924 | 0.041   | -0.2728 | -0.112   | -4.692 | 3.06E-06 |
| 20  | rs2423712   | 12875977  | T  | ADDxstd_mixture_ab42 | 1065 | -0.1871 | 0.04102 | -0.2675 | -0.1067  | -4.562 | 5.66E-06 |
| 20  | rs6033541   | 12880005  | A  | ADDxstd_mixture_ab42 | 1065 | -0.1811 | 0.04071 | -0.2608 | -0.1013  | -4.447 | 9.63E-06 |
| 20  | rs926902    | 12880880  | T  | ADDxstd_mixture_ab42 | 1065 | -0.1809 | 0.04072 | -0.2607 | -0.1011  | -4.442 | 9.85E-06 |
| 20  | rs1321951   | 12882115  | C  | ADDxstd_mixture_ab42 | 1065 | -0.1873 | 0.04097 | -0.2676 | -0.107   | -4.573 | 5.38E-06 |
| 20  | rs768875    | 12882649  | G  | ADDxstd_mixture_ab42 | 1065 | -0.2005 | 0.04102 | -0.2809 | -0.1201  | -4.888 | 1.18E-06 |
| 20  | rs1624243   | 12884535  | T  | ADDxstd_mixture_ab42 | 1065 | -0.2005 | 0.04102 | -0.2809 | -0.1201  | -4.888 | 1.18E-06 |
| 20  | rs562596    | 12885700  | C  | ADDxstd_mixture_ab42 | 1065 | -0.2005 | 0.04102 | -0.2809 | -0.1201  | -4.888 | 1.18E-06 |
| 20  | rs45710     | 12887609  | G  | ADDxstd_mixture_ab42 | 1065 | -0.2005 | 0.04102 | -0.2809 | -0.1201  | -4.888 | 1.18E-06 |
| 20  | rs439580    | 12888105  | C  | ADDxstd_mixture_ab42 | 1065 | -0.2005 | 0.04102 | -0.2809 | -0.1201  | -4.888 | 1.18E-06 |
| 20  | rs550630    | 12890927  | T  | ADDxstd_mixture_ab42 | 1065 | -0.1992 | 0.04102 | -0.2796 | -0.1188  | -4.856 | 1.38E-06 |
| 20  | rs552504    | 12891137  | T  | ADDxstd_mixture_ab42 | 1065 | -0.1988 | 0.04102 | -0.2792 | -0.1184  | -4.845 | 1.45E-06 |

**Table S10.** Suggestive loci for the SNP x CSF AB42 interaction on the annual change in hippocampal volume. Highlighted SNPs were included as main results in the manuscript.

| CHR | SNP         | BP        | A1 | TEST                 | N    | Beta     | SE       | L95      | U95      | T-STAT | P        |
|-----|-------------|-----------|----|----------------------|------|----------|----------|----------|----------|--------|----------|
| 1   | rs2205897   | 186812367 | T  | ADDxstd_mixture_ab42 | 1065 | 0.01105  | 0.00246  | 0.006231 | 0.01588  | 4.493  | 7.81E-06 |
| 1   | rs10489407  | 186824113 | A  | ADDxstd_mixture_ab42 | 1065 | 0.01091  | 0.002457 | 0.006095 | 0.01573  | 4.44   | 9.93E-06 |
| 1   | rs4651332   | 186826361 | T  | ADDxstd_mixture_ab42 | 1065 | 0.01143  | 0.002468 | 0.006593 | 0.01627  | 4.631  | 4.09E-06 |
| 1   | rs4651334   | 186826844 | A  | ADDxstd_mixture_ab42 | 1065 | 0.01124  | 0.002464 | 0.006413 | 0.01607  | 4.563  | 5.64E-06 |
| 1   | rs10732978  | 186827843 | A  | ADDxstd_mixture_ab42 | 1065 | 0.01143  | 0.002488 | 0.006551 | 0.0163   | 4.593  | 4.89E-06 |
| 1   | rs6688584   | 186829074 | T  | ADDxstd_mixture_ab42 | 1065 | 0.01143  | 0.002488 | 0.006551 | 0.0163   | 4.593  | 4.89E-06 |
| 1   | rs10911933  | 186830564 | C  | ADDxstd_mixture_ab42 | 1065 | 0.01142  | 0.002489 | 0.006546 | 0.0163   | 4.59   | 4.97E-06 |
| 1   | rs10911934  | 186830636 | A  | ADDxstd_mixture_ab42 | 1065 | 0.01143  | 0.002488 | 0.006551 | 0.0163   | 4.593  | 4.89E-06 |
| 1   | rs10737270  | 186831073 | T  | ADDxstd_mixture_ab42 | 1065 | 0.01143  | 0.002488 | 0.006551 | 0.0163   | 4.593  | 4.89E-06 |
| 1   | rs10798060  | 186831513 | C  | ADDxstd_mixture_ab42 | 1065 | 0.01143  | 0.002488 | 0.006551 | 0.0163   | 4.593  | 4.89E-06 |
| 1   | rs6685652   | 186831728 | C  | ADDxstd_mixture_ab42 | 1065 | 0.01143  | 0.002488 | 0.006551 | 0.0163   | 4.593  | 4.89E-06 |
| 1   | rs10752977  | 186834039 | G  | ADDxstd_mixture_ab42 | 1065 | 0.01143  | 0.002488 | 0.006551 | 0.0163   | 4.593  | 4.89E-06 |
| 1   | rs10752978  | 186835740 | A  | ADDxstd_mixture_ab42 | 1065 | 0.01143  | 0.002488 | 0.006551 | 0.0163   | 4.593  | 4.89E-06 |
| 1   | rs10752979  | 186835995 | A  | ADDxstd_mixture_ab42 | 1065 | 0.01143  | 0.002488 | 0.006551 | 0.0163   | 4.593  | 4.89E-06 |
| 1   | rs10798061  | 186836066 | A  | ADDxstd_mixture_ab42 | 1065 | 0.01143  | 0.002488 | 0.006551 | 0.0163   | 4.593  | 4.89E-06 |
| 1   | rs7521601   | 186836394 | T  | ADDxstd_mixture_ab42 | 1065 | 0.01154  | 0.002489 | 0.006661 | 0.01642  | 4.636  | 3.99E-06 |
| 1   | rs7532616   | 186836889 | A  | ADDxstd_mixture_ab42 | 1065 | 0.01154  | 0.002489 | 0.006661 | 0.01642  | 4.636  | 3.99E-06 |
| 1   | rs6425052   | 186837191 | C  | ADDxstd_mixture_ab42 | 1065 | 0.01154  | 0.002489 | 0.006661 | 0.01642  | 4.636  | 3.99E-06 |
| 1   | rs6687896   | 186837421 | G  | ADDxstd_mixture_ab42 | 1065 | 0.01154  | 0.002489 | 0.006661 | 0.01642  | 4.636  | 3.99E-06 |
| 1   | rs6425053   | 186837754 | A  | ADDxstd_mixture_ab42 | 1065 | 0.01127  | 0.002512 | 0.006351 | 0.0162   | 4.488  | 7.96E-06 |
| 1   | rs7541946   | 186838268 | C  | ADDxstd_mixture_ab42 | 1065 | 0.01154  | 0.002489 | 0.006661 | 0.01642  | 4.636  | 3.99E-06 |
| 1   | rs75574076  | 215969990 | T  | ADDxstd_mixture_ab42 | 1065 | -0.02433 | 0.005185 | -0.03449 | -0.01416 | -4.691 | 3.07E-06 |
| 1   | rs4314861   | 215970771 | G  | ADDxstd_mixture_ab42 | 1065 | -0.02438 | 0.00503  | -0.03423 | -0.01452 | -4.846 | 1.45E-06 |
| 1   | rs7416880   | 215971402 | A  | ADDxstd_mixture_ab42 | 1065 | -0.02438 | 0.00503  | -0.03423 | -0.01452 | -4.846 | 1.45E-06 |
| 1   | rs12129576  | 215972121 | C  | ADDxstd_mixture_ab42 | 1065 | -0.02438 | 0.00503  | -0.03423 | -0.01452 | -4.846 | 1.45E-06 |
| 1   | rs12132110  | 215972180 | A  | ADDxstd_mixture_ab42 | 1065 | -0.02438 | 0.00503  | -0.03423 | -0.01452 | -4.846 | 1.45E-06 |
| 1   | rs74447991  | 215972980 | T  | ADDxstd_mixture_ab42 | 1065 | -0.02438 | 0.00503  | -0.03423 | -0.01452 | -4.846 | 1.45E-06 |
| 1   | rs12140781  | 215973131 | A  | ADDxstd_mixture_ab42 | 1065 | -0.02438 | 0.00503  | -0.03423 | -0.01452 | -4.846 | 1.45E-06 |
| 1   | rs112167269 | 215974593 | G  | ADDxstd_mixture_ab42 | 1065 | -0.02402 | 0.005139 | -0.03409 | -0.01395 | -4.674 | 3.34E-06 |
| 1   | rs12132976  | 215978592 | A  | ADDxstd_mixture_ab42 | 1065 | -0.02411 | 0.005026 | -0.03396 | -0.01426 | -4.797 | 1.84E-06 |
| 1   | rs12130528  | 215978891 | C  | ADDxstd_mixture_ab42 | 1065 | -0.02402 | 0.005139 | -0.03409 | -0.01395 | -4.674 | 3.34E-06 |



|               |           |   |                      |      |          |          |          |          |        |          |
|---------------|-----------|---|----------------------|------|----------|----------|----------|----------|--------|----------|
| 1 rs12135237  | 215981038 | A | ADDxstd_mixture_ab42 | 1065 | -0.02411 | 0.005026 | -0.03396 | -0.01426 | -4.797 | 1.84E-06 |
| 1 rs12133551  | 215981542 | C | ADDxstd_mixture_ab42 | 1065 | -0.02411 | 0.005026 | -0.03396 | -0.01426 | -4.797 | 1.84E-06 |
| 1 rs12144789  | 215982435 | T | ADDxstd_mixture_ab42 | 1065 | -0.0247  | 0.005039 | -0.03458 | -0.01483 | -4.903 | 1.09E-06 |
| 1 rs777107095 | 215984842 | A | ADDxstd_mixture_ab42 | 1065 | -0.02476 | 0.00504  | -0.03464 | -0.01488 | -4.913 | 1.04E-06 |
| 1 rs112636864 | 215985470 | A | ADDxstd_mixture_ab42 | 1065 | -0.02476 | 0.00504  | -0.03464 | -0.01488 | -4.913 | 1.04E-06 |
| 1 rs113395363 | 215985617 | T | ADDxstd_mixture_ab42 | 1065 | -0.02476 | 0.00504  | -0.03464 | -0.01488 | -4.913 | 1.04E-06 |
| 1 rs12137796  | 215988310 | T | ADDxstd_mixture_ab42 | 1065 | -0.02512 | 0.005219 | -0.03535 | -0.01489 | -4.814 | 1.70E-06 |
| 1 rs74822708  | 215988582 | A | ADDxstd_mixture_ab42 | 1065 | -0.02476 | 0.00504  | -0.03464 | -0.01488 | -4.913 | 1.04E-06 |
| 1 rs141173782 | 215988815 | T | ADDxstd_mixture_ab42 | 1065 | -0.02512 | 0.005219 | -0.03535 | -0.01489 | -4.814 | 1.70E-06 |
| 1 rs11120645  | 215990479 | T | ADDxstd_mixture_ab42 | 1065 | -0.02476 | 0.00504  | -0.03464 | -0.01488 | -4.913 | 1.04E-06 |
| 1 rs112137445 | 215990733 | A | ADDxstd_mixture_ab42 | 1065 | -0.02418 | 0.005028 | -0.03403 | -0.01432 | -4.809 | 1.74E-06 |
| 1 rs12141208  | 215992060 | C | ADDxstd_mixture_ab42 | 1065 | -0.02451 | 0.005206 | -0.03472 | -0.01431 | -4.708 | 2.84E-06 |
| 1 rs12139361  | 215992211 | A | ADDxstd_mixture_ab42 | 1065 | -0.02418 | 0.005028 | -0.03403 | -0.01432 | -4.809 | 1.74E-06 |
| 1 rs113042941 | 215994806 | C | ADDxstd_mixture_ab42 | 1065 | -0.02451 | 0.005206 | -0.03472 | -0.01431 | -4.708 | 2.84E-06 |
| 1 rs4453013   | 215995439 | A | ADDxstd_mixture_ab42 | 1065 | -0.02418 | 0.005028 | -0.03403 | -0.01432 | -4.809 | 1.74E-06 |
| 1 rs12138094  | 215996395 | A | ADDxstd_mixture_ab42 | 1065 | -0.02418 | 0.005028 | -0.03403 | -0.01432 | -4.809 | 1.74E-06 |
| 1 rs79937377  | 215998400 | A | ADDxstd_mixture_ab42 | 1065 | -0.02418 | 0.005028 | -0.03403 | -0.01432 | -4.809 | 1.74E-06 |
| 1 rs12141340  | 215999611 | C | ADDxstd_mixture_ab42 | 1065 | -0.02418 | 0.005028 | -0.03403 | -0.01432 | -4.809 | 1.74E-06 |
| 1 rs11120650  | 215999733 | T | ADDxstd_mixture_ab42 | 1065 | -0.02418 | 0.005028 | -0.03403 | -0.01432 | -4.809 | 1.74E-06 |
| 1 rs12117370  | 216002713 | A | ADDxstd_mixture_ab42 | 1065 | -0.02429 | 0.005065 | -0.03422 | -0.01437 | -4.796 | 1.85E-06 |
| 1 rs79825305  | 216003716 | A | ADDxstd_mixture_ab42 | 1065 | -0.0242  | 0.005186 | -0.03437 | -0.01404 | -4.666 | 3.46E-06 |
| 1 rs12409223  | 216004375 | G | ADDxstd_mixture_ab42 | 1065 | -0.02429 | 0.005065 | -0.03422 | -0.01437 | -4.796 | 1.85E-06 |
| 1 rs112141149 | 216005846 | G | ADDxstd_mixture_ab42 | 1065 | -0.02422 | 0.005066 | -0.03415 | -0.01429 | -4.796 | 1.85E-06 |
| 1 rs1934430   | 216008102 | T | ADDxstd_mixture_ab42 | 1065 | -0.02459 | 0.005086 | -0.03455 | -0.01462 | -4.834 | 1.54E-06 |
| 1 rs1416842   | 216009305 | A | ADDxstd_mixture_ab42 | 1065 | -0.02459 | 0.005086 | -0.03455 | -0.01462 | -4.834 | 1.54E-06 |
| 1 rs79789651  | 216010377 | C | ADDxstd_mixture_ab42 | 1065 | -0.0245  | 0.005087 | -0.03447 | -0.01453 | -4.816 | 1.68E-06 |
| 1 rs41277194  | 216011408 | C | ADDxstd_mixture_ab42 | 1065 | -0.0245  | 0.005087 | -0.03447 | -0.01453 | -4.816 | 1.68E-06 |
| 1 rs12402107  | 216012743 | G | ADDxstd_mixture_ab42 | 1065 | -0.0245  | 0.005087 | -0.03447 | -0.01453 | -4.816 | 1.68E-06 |
| 1 rs76191410  | 216013040 | A | ADDxstd_mixture_ab42 | 1065 | -0.02508 | 0.005099 | -0.03507 | -0.01508 | -4.918 | 1.01E-06 |
| 1 rs12123296  | 216013576 | T | ADDxstd_mixture_ab42 | 1065 | -0.02508 | 0.005099 | -0.03507 | -0.01508 | -4.918 | 1.01E-06 |
| 1 rs12126534  | 216014657 | A | ADDxstd_mixture_ab42 | 1065 | -0.02517 | 0.005098 | -0.03517 | -0.01518 | -4.938 | 9.18E-07 |
| 1 rs113393658 | 216015741 | A | ADDxstd_mixture_ab42 | 1065 | -0.02517 | 0.005098 | -0.03517 | -0.01518 | -4.938 | 9.18E-07 |
| 1 rs146752822 | 216015809 | A | ADDxstd_mixture_ab42 | 1065 | -0.02508 | 0.005099 | -0.03507 | -0.01508 | -4.918 | 1.01E-06 |
| 1 rs112735413 | 216016259 | A | ADDxstd_mixture_ab42 | 1065 | -0.02508 | 0.005099 | -0.03507 | -0.01508 | -4.918 | 1.01E-06 |
| 1 rs75410548  | 216016299 | C | ADDxstd_mixture_ab42 | 1065 | -0.02508 | 0.005099 | -0.03507 | -0.01508 | -4.918 | 1.01E-06 |
| 1 rs76992333  | 216016596 | T | ADDxstd_mixture_ab42 | 1065 | -0.02508 | 0.005099 | -0.03507 | -0.01508 | -4.918 | 1.01E-06 |
| 1 rs12132798  | 216020536 | G | ADDxstd_mixture_ab42 | 1065 | -0.02517 | 0.005098 | -0.03517 | -0.01518 | -4.938 | 9.18E-07 |
| 1 rs12126346  | 216021952 | C | ADDxstd_mixture_ab42 | 1065 | -0.0245  | 0.005087 | -0.03447 | -0.01453 | -4.816 | 1.68E-06 |

|    |             |           |   |                      |      |           |          |          |           |        |          |
|----|-------------|-----------|---|----------------------|------|-----------|----------|----------|-----------|--------|----------|
| 1  | rs12406554  | 216032737 | T | ADDxstd_mixture_ab42 | 1065 | -0.02512  | 0.005219 | -0.03535 | -0.01489  | -4.814 | 1.70E-06 |
| 1  | rs12129954  | 216033741 | C | ADDxstd_mixture_ab42 | 1065 | -0.02512  | 0.005219 | -0.03535 | -0.01489  | -4.814 | 1.70E-06 |
| 3  | rs4677869   | 122664907 | T | ADDxstd_mixture_ab42 | 1065 | 0.01559   | 0.00283  | 0.01005  | 0.02114   | 5.51   | 4.50E-08 |
| 3  | rs2288678   | 122667277 | G | ADDxstd_mixture_ab42 | 1065 | 0.01602   | 0.002949 | 0.01024  | 0.0218    | 5.432  | 6.90E-08 |
| 3  | rs4677982   | 122668294 | C | ADDxstd_mixture_ab42 | 1065 | 0.01507   | 0.002929 | 0.009331 | 0.02081   | 5.146  | 3.17E-07 |
| 3  | rs4677983   | 122669157 | A | ADDxstd_mixture_ab42 | 1065 | 0.01494   | 0.002923 | 0.009213 | 0.02067   | 5.112  | 3.79E-07 |
| 3  | rs4677984   | 122669629 | T | ADDxstd_mixture_ab42 | 1065 | 0.01494   | 0.002923 | 0.009213 | 0.02067   | 5.112  | 3.79E-07 |
| 3  | rs11706210  | 122669812 | C | ADDxstd_mixture_ab42 | 1065 | 0.01546   | 0.002938 | 0.009697 | 0.02122   | 5.26   | 1.74E-07 |
| 3  | rs4677870   | 122669854 | C | ADDxstd_mixture_ab42 | 1065 | 0.01494   | 0.002923 | 0.009213 | 0.02067   | 5.112  | 3.79E-07 |
| 3  | rs11707039  | 122670139 | A | ADDxstd_mixture_ab42 | 1065 | 0.01546   | 0.002938 | 0.009697 | 0.02122   | 5.26   | 1.74E-07 |
| 3  | rs35989119  | 122671081 | C | ADDxstd_mixture_ab42 | 1065 | 0.01484   | 0.002925 | 0.009106 | 0.02057   | 5.073  | 4.62E-07 |
| 3  | rs10934625  | 122671316 | C | ADDxstd_mixture_ab42 | 1065 | 0.01483   | 0.002925 | 0.0091   | 0.02057   | 5.071  | 4.67E-07 |
| 3  | rs62263260  | 122675327 | T | ADDxstd_mixture_ab42 | 1065 | 0.01627   | 0.002849 | 0.01069  | 0.02185   | 5.711  | 1.46E-08 |
| 3  | rs11707826  | 122676305 | T | ADDxstd_mixture_ab42 | 1065 | 0.01624   | 0.002848 | 0.01066  | 0.02182   | 5.703  | 1.53E-08 |
| 3  | rs10934626  | 122676523 | T | ADDxstd_mixture_ab42 | 1065 | 0.01624   | 0.002848 | 0.01066  | 0.02182   | 5.703  | 1.53E-08 |
| 5  | rs1363073   | 163418856 | T | ADDxstd_mixture_ab42 | 1065 | 0.01073   | 0.002329 | 0.006162 | 0.01529   | 4.605  | 4.62E-06 |
| 6  | rs116647170 | 150541084 | T | ADDxstd_mixture_ab42 | 1065 | 0.04692   | 0.01049  | 0.02636  | 0.06749   | 4.472  | 8.57E-06 |
| 7  | rs10279772  | 38706384  | A | ADDxstd_mixture_ab42 | 1065 | -0.009845 | 0.002193 | -0.01414 | -0.005547 | -4.49  | 7.92E-06 |
| 7  | rs10280089  | 38706817  | A | ADDxstd_mixture_ab42 | 1065 | -0.009845 | 0.002193 | -0.01414 | -0.005547 | -4.49  | 7.92E-06 |
| 9  | rs4130590   | 130107964 | A | ADDxstd_mixture_ab42 | 1065 | -0.008438 | 0.001861 | -0.01209 | -0.00479  | -4.534 | 6.44E-06 |
| 9  | rs7041940   | 130109746 | T | ADDxstd_mixture_ab42 | 1065 | -0.008438 | 0.001861 | -0.01209 | -0.00479  | -4.534 | 6.44E-06 |
| 9  | rs6478770   | 130112231 | T | ADDxstd_mixture_ab42 | 1065 | -0.008339 | 0.001862 | -0.01201 | -0.004709 | -4.48  | 7.96E-06 |
| 11 | rs938591    | 21075857  | C | ADDxstd_mixture_ab42 | 1065 | 0.01013   | 0.002282 | 0.005657 | 0.0146    | 4.439  | 1.00E-05 |
| 11 | rs10833448  | 21076108  | T | ADDxstd_mixture_ab42 | 1065 | 0.0103    | 0.002282 | 0.00583  | 0.01477   | 4.515  | 7.05E-06 |
| 11 | rs16917214  | 91976408  | T | ADDxstd_mixture_ab42 | 1065 | 0.0101    | 0.002241 | 0.005708 | 0.01449   | 4.507  | 7.30E-06 |
| 11 | rs16917218  | 91976564  | A | ADDxstd_mixture_ab42 | 1065 | 0.0101    | 0.002241 | 0.005708 | 0.01449   | 4.507  | 7.30E-06 |
| 11 | rs2054215   | 91976737  | A | ADDxstd_mixture_ab42 | 1065 | 0.01012   | 0.002242 | 0.005724 | 0.01451   | 4.514  | 7.09E-06 |
| 11 | rs12576325  | 91978130  | T | ADDxstd_mixture_ab42 | 1065 | 0.01014   | 0.002244 | 0.005747 | 0.01454   | 4.521  | 6.85E-06 |
| 11 | rs12786200  | 91979018  | T | ADDxstd_mixture_ab42 | 1065 | 0.01014   | 0.002244 | 0.005747 | 0.01454   | 4.521  | 6.85E-06 |
| 11 | rs12577025  | 91979120  | A | ADDxstd_mixture_ab42 | 1065 | 0.0102    | 0.00224  | 0.005808 | 0.01459   | 4.553  | 5.90E-06 |
| 11 | rs10501774  | 91979868  | A | ADDxstd_mixture_ab42 | 1065 | 0.0102    | 0.00224  | 0.005808 | 0.01459   | 4.553  | 5.90E-06 |
| 11 | rs1320636   | 91980524  | A | ADDxstd_mixture_ab42 | 1065 | 0.0102    | 0.00224  | 0.005808 | 0.01459   | 4.553  | 5.90E-06 |
| 11 | rs2212387   | 91981546  | T | ADDxstd_mixture_ab42 | 1065 | 0.01014   | 0.002244 | 0.005747 | 0.01454   | 4.521  | 6.85E-06 |
| 11 | rs7934732   | 91981618  | T | ADDxstd_mixture_ab42 | 1065 | 0.01014   | 0.002244 | 0.005747 | 0.01454   | 4.521  | 6.85E-06 |
| 11 | rs7935097   | 91981960  | T | ADDxstd_mixture_ab42 | 1065 | 0.01025   | 0.002243 | 0.005856 | 0.01465   | 4.57   | 5.45E-06 |
| 11 | rs1037731   | 91983763  | G | ADDxstd_mixture_ab42 | 1065 | 0.01051   | 0.002216 | 0.006168 | 0.01486   | 4.743  | 2.39E-06 |
| 11 | rs4753405   | 91984288  | T | ADDxstd_mixture_ab42 | 1065 | 0.01025   | 0.002243 | 0.005856 | 0.01465   | 4.57   | 5.45E-06 |
| 11 | rs4536170   | 91986020  | C | ADDxstd_mixture_ab42 | 1065 | 0.01046   | 0.00222  | 0.006108 | 0.01481   | 4.711  | 2.79E-06 |

|    |            |          |   |                      |      |           |          |          |           |        |          |
|----|------------|----------|---|----------------------|------|-----------|----------|----------|-----------|--------|----------|
| 11 | rs963960   | 91986620 | T | ADDxstd_mixture_ab42 | 1065 | 0.01051   | 0.002216 | 0.006168 | 0.01486   | 4.743  | 2.39E-06 |
| 11 | rs4542368  | 91988615 | T | ADDxstd_mixture_ab42 | 1065 | 0.01052   | 0.002218 | 0.006169 | 0.01486   | 4.742  | 2.41E-06 |
| 11 | rs12276382 | 91993712 | C | ADDxstd_mixture_ab42 | 1065 | 0.01056   | 0.002235 | 0.006175 | 0.01494   | 4.723  | 2.64E-06 |
| 11 | rs6483171  | 91996037 | A | ADDxstd_mixture_ab42 | 1065 | 0.01044   | 0.002239 | 0.006053 | 0.01483   | 4.663  | 3.52E-06 |
| 11 | rs7944251  | 91996431 | A | ADDxstd_mixture_ab42 | 1065 | 0.01044   | 0.002239 | 0.006053 | 0.01483   | 4.663  | 3.52E-06 |
| 12 | rs74592637 | 97545468 | A | ADDxstd_mixture_ab42 | 1065 | -0.02527  | 0.005628 | -0.0363  | -0.01424  | -4.49  | 7.92E-06 |
| 12 | rs2371519  | 97550185 | G | ADDxstd_mixture_ab42 | 1065 | -0.02527  | 0.005628 | -0.0363  | -0.01424  | -4.49  | 7.92E-06 |
| 12 | rs11108857 | 97553106 | C | ADDxstd_mixture_ab42 | 1065 | -0.02527  | 0.005628 | -0.0363  | -0.01424  | -4.49  | 7.92E-06 |
| 16 | rs7196791  | 25756588 | T | ADDxstd_mixture_ab42 | 1065 | -0.01332  | 0.002944 | -0.01909 | -0.00755  | -4.524 | 6.75E-06 |
| 17 | rs3110609  | 46753543 | C | ADDxstd_mixture_ab42 | 1065 | -0.009259 | 0.002049 | -0.01327 | -0.005243 | -4.519 | 6.91E-06 |
| 17 | rs3096644  | 46757575 | T | ADDxstd_mixture_ab42 | 1065 | -0.009195 | 0.002027 | -0.01317 | -0.005221 | -4.535 | 6.41E-06 |

| <b>Supplementary Table 11: Summary of all coefficients from APOE interaction models</b>   |         |        |            |
|-------------------------------------------------------------------------------------------|---------|--------|------------|
| <b>Model: Baseline Hippoc. Vol. ~ Age at baseline MRI + sex + APOE-ε4 x CSF Aβ42</b>      |         |        |            |
| Predictor                                                                                 | B       | SE     | P value    |
| Intercept                                                                                 | 3.491   | 0.291  | < 2.00e-16 |
| Age at baseline MRI                                                                       | -0.051  | 0.004  | < 2.00e-16 |
| Sex                                                                                       | -0.106  | 0.062  | 0.1        |
| APOE-ε4                                                                                   | -0.008  | 0.086  | 0.923      |
| CSF Aβ42                                                                                  | 0.107   | 0.025  | 1.44e-5    |
| APOE-ε4 x CSF Aβ42                                                                        | 0.111   | 0.031  | 0.0004     |
| <b>Model: Baseline Hippoc. Vol. ~ Age at baseline MRI + sex + APOE-ε2 x CSF Aβ42</b>      |         |        |            |
| Predictor                                                                                 | B       | SE     | P value    |
| Intercept                                                                                 | 3.345   | 0.283  | < 2.00e-16 |
| Age at baseline MRI                                                                       | -0.050  | 0.004  | < 2.00e-16 |
| Sex                                                                                       | -0.093  | 0.062  | 0.134      |
| APOE-ε2                                                                                   | 0.006   | 0.109  | 0.955      |
| CSF Aβ42                                                                                  | 0.208   | 0.02   | < 2.00e-16 |
| APOE-ε2 x CSF Aβ42                                                                        | -0.13   | 0.06   | 0.0435     |
| <b>Model: Annual Change Hippoc. Vol. ~ Age at baseline MRI + sex + APOE-ε4 x CSF Aβ42</b> |         |        |            |
| Predictor                                                                                 | B       | SE     | P value    |
| Intercept                                                                                 | 0.086   | 0.017  | 7.93e-7    |
| Age at baseline MRI                                                                       | -0.003  | 0.0002 | < 2.00e-16 |
| Sex                                                                                       | -0.0005 | 0.004  | 0.898      |
| APOE-ε4                                                                                   | -0.034  | 0.005  | 0.494      |
| CSF Aβ42                                                                                  | 0.011   | 0.001  | 2.19e-13   |
| APOE-ε4 x CSF Aβ42 <sup>b</sup>                                                           | 0.0056  | 0.002  | 0.0024     |
| <b>Model: Annual Change Hippoc. Vol. ~ Age at baseline MRI + sex + APOE-ε2 x CSF Aβ42</b> |         |        |            |
| Predictor                                                                                 | B       | SE     | P value    |
| Intercept                                                                                 | 0.074   | 0.017  | 1.10e-5    |
| Age at baseline MRI                                                                       | -0.003  | 0.0002 | < 2.00e-16 |
| Sex                                                                                       | -0.0002 | 0.004  | 0.961      |
| APOE-ε2                                                                                   | 0.007   | 0.006  | 0.257      |
| CSF Aβ42                                                                                  | 0.016   | 0.001  | < 2.00e-16 |
| APOE-ε2x CSF Aβ42                                                                         | -0.0054 | 0.004  | 0.152      |

**Supplementary Table 12: All coefficients from rs62263260 x  $\beta$ -Amyloid model****Model: Annual change of HV ~ Age at baseline MRI + sex + PC1-3 + rs62263260 x CSF A $\beta$ -42**

| Predictor                     | B       | SE     | P value    |
|-------------------------------|---------|--------|------------|
| Intercept                     | 0.0696  | 0.021  | 0.0013     |
| Sex                           | -0.0007 | 0.005  | 0.877      |
| Age at baseline MRI           | -0.0026 | 0.0003 | < 2.00e-16 |
| PC1                           | -0.0523 | 0.114  | 0.646      |
| PC2                           | -0.145  | 0.128  | 0.256      |
| PC3                           | -0.0151 | 0.111  | 0.892      |
| rs62263260                    | 0.016   | 0.006  | 0.011      |
| CSF A $\beta$ 42              | 0.014   | 0.002  | < 2.00e-16 |
| rs62263260 x CSF A $\beta$ 42 | 0.02621 | 0.0046 | 1.46e-08   |

**Supplementary Table 13. Sensitivity Analyses for SNP x  $\beta$ -Amyloid GWAS**

| Analysis                 | variant    | chromosome | BP        | allele | MAF   | B       | SE       | P value  |
|--------------------------|------------|------------|-----------|--------|-------|---------|----------|----------|
| <i>APOE4</i> + Scanner   | rs62263260 | 3          | 122675327 | T      | 0.121 | 0.01617 | 0.002761 | 6.30e-09 |
| <i>APOE4</i> + Scanner   | rs11707826 | 3          | 122676305 | T      | 0.122 | 0.01615 | 0.00276  | 6.54e-09 |
| <i>APOE4</i> + Scanner   | rs10934626 | 3          | 122676523 | T      | 0.122 | 0.01615 | 0.00276  | 6.54e-09 |
| Mixed-Effects Regression | rs62263260 | 3          | 122675327 | T      | 0.121 | 0.03302 | 0.00595  | 3.13e-08 |
| Mixed-Effects Regression | rs11707826 | 3          | 122676305 | T      | 0.122 | 0.03296 | 0.00595  | 3.27e-08 |
| Mixed-Effects Regression | rs10934626 | 3          | 122676523 | T      | 0.122 | 0.03294 | 0.00595  | 3.27e-08 |

Table S14. CSF AB Transcription Factor Binding Site Overlap

| chr  | rsid       | pos       | ref | alt      | MAF       | tag_rs10  | tag_pos   | tag_MAF          | tag_name         | RZ       | Dprime   | modif_chr | modif_start | modif_end    | f_name     | log_odds_score | strand | relative_snp_p1 | ref_pwm  | alt_pwm  | delta_pwm | rel_prob | alt_prob | modif_seq | p_val    |
|------|------------|-----------|-----|----------|-----------|-----------|-----------|------------------|------------------|----------|----------|-----------|-------------|--------------|------------|----------------|--------|-----------------|----------|----------|-----------|----------|----------|-----------|----------|
| chr3 | rs2288678  | 122667277 | A   | G        | 0.081794  | rs4677869 | 122664907 | 0.108179         | SEMA5B-rs4677869 | 0.707308 | 0.981402 | chr3      | 122667274   | 122667283    | ETS1(ETS)  | 7 -            |        | 7               | 7.49974  | 2.639928 | -4.85981  | 0.129    | 0.001    | GCACGATC  | 0.003333 |
| chr3 | rs2288678  | 122667277 | A   | G        | 0.081794  | rs4677869 | 122664907 | 0.108179         | SEMA5B-rs4677869 | 0.707308 | 0.981402 | chr3      | 122667275   | 122667284    | SPDEF(ETS) | 8 +            |        | 7               | 7.607959 | 1.264079 | -6.34388  | 0.569    | 0.001    | ACATCTTC  | 0.003333 |
| chr3 | rs10934621 | 122671316 | T   | 0.081794 | rs4677869 | 122664907 | 0.108179  | SEMA5B-rs4677869 | 0.707322         | 0.981411 | chr3     | 122671310 | 122671321   | NUP70(NK)    | 10 +       |                | 7      | 9.508289        | 2.603538 | -6.90475 | 0.997     | 0.001    | TACCTCTT | 0.003333  |          |
| chr3 | rs10934621 | 122670523 | C   | 0.083752 | rs6226326 | 122675327 | 0.083752  | SEMA5B-rs6226326 | 0.707322         | 0.981411 | chr3     | 122670518 | 122670523   | SCL(HELI)    | 6 +        |                | 6      | 6.142897        | 1.036752 | -5.10955 | 0.86      | 0.004    | KCCACCTT | 0.01      |          |
| chr3 | rs3389211  | 122671081 | A   | 0.081794 | rs4677869 | 122664907 | 0.108179  | SEMA5B-rs4677869 | 0.707308         | 0.981411 | chr3     | 122671077 | 122671084   | ERK1home     | 5 +        |                | 3      | 6.853834        | 0.326772 | -4.48434 | 0.975     | 0.011    | ATTATCC  | 0.022     |          |
| chr3 | rs10934621 | 122670523 | C   | 0.083752 | rs6226326 | 122675327 | 0.083752  | SEMA5B-rs6226326 | 0.707308         | 0.981402 | chr3     | 122670517 | 122670524   | SCL(HELI)    | 7 -        |                | 8      | 6.437888        | 6.104669 | -0.37302 | 0.376     | 0.261    | ACCTCTTC | 0.372857  |          |
| chr3 | rs10934621 | 122670523 | C   | 0.083752 | rs6226326 | 122675327 | 0.083752  | SEMA5B-rs6226326 | 0.707322         | 0.981411 | chr3     | 122670516 | 122670525   | TF12(HELI)   | 6 -        |                | 8      | 7.484794        | 7.204884 | -0.27996 | 0.43      | 0.325    | ACACGACG | 0.40625   |          |
| chr3 | rs4677870  | 122669854 | C   | 0.081794 | rs4677869 | 122664907 | 0.108179  | SEMA5B-rs4677869 | 0.707322         | 0.981411 | chr3     | 122669844 | 122669859   | PAX7(paired) | 7 +        |                | 6      | 8.026829        | 8.852075 | 0.825246 | 0.262     | 0.598    | CCACTCAG | 0.664444  |          |
| chr3 | rs4677870  | 122669854 | C   | 0.081794 | rs4677869 | 122664907 | 0.108179  | SEMA5B-rs4677869 | 0.707322         | 0.981411 | chr3     | 122669845 | 122669859   | Pax8(paired) | 8 -        |                | 10     | 9.654278        | 10.80432 | 1.150045 | 0.24      | 0.758    | ATCATGCC | 0.758     |          |

**Table S15.** MAGMA Gene-Test Results for SNP x AB42 GWAS for Hip. Slopes (subset to unadjusted  $p < 0.05$ )

| GENE         | CHR | START     | STOP      | NSNPS | NPARAM | N    | ZSTAT  | P        | p.fdr    |
|--------------|-----|-----------|-----------|-------|--------|------|--------|----------|----------|
| TOMM40       | 19  | 45394477  | 45406946  | 27    | 4      | 1065 | 4.4194 | 4.95E-06 | 0.086305 |
| DPYD         | 1   | 97543299  | 98386615  | 1574  | 134    | 1065 | 4.1571 | 1.61E-05 | 0.140513 |
| LOC101060400 | 17  | 46712166  | 46724875  | 37    | 7      | 1065 | 4.0241 | 2.86E-05 | 0.166253 |
| USH2A        | 1   | 215796236 | 216596738 | 1692  | 165    | 1065 | 3.8066 | 7.04E-05 | 0.229768 |
| MBTPS1       | 16  | 84087368  | 84150517  | 225   | 25     | 1065 | 3.7639 | 8.36E-05 | 0.229768 |
| PACSI1       | 11  | 65837747  | 66012218  | 225   | 14     | 1065 | 3.7639 | 8.36E-05 | 0.229768 |
| HOXB9        | 17  | 46698518  | 46703835  | 14    | 4      | 1065 | 3.7394 | 9.22E-05 | 0.229768 |
| ISMI         | 20  | 13202418  | 13281297  | 202   | 25     | 1065 | 3.6414 | 1.36E-04 | 0.295603 |
| COBL         | 7   | 51083909  | 51384515  | 480   | 40     | 1065 | 3.5566 | 1.88E-04 | 0.363955 |
| CDK5RAP3     | 17  | 46047894  | 46059152  | 28    | 4      | 1065 | 3.5124 | 2.22E-04 | 0.387225 |
| NRL          | 14  | 24547902  | 24584223  | 27    | 7      | 1065 | 3.4523 | 2.78E-04 | 0.405547 |
| HOXB3        | 17  | 46626232  | 46667634  | 79    | 15     | 1065 | 3.4512 | 2.79E-04 | 0.405547 |
| IL12RB2      | 1   | 67773047  | 67862583  | 199   | 15     | 1065 | 3.4036 | 3.32E-04 | 0.425523 |
| APOE         | 19  | 45409039  | 45412650  | 4     | 2      | 1065 | 3.3963 | 3.42E-04 | 0.425523 |
| CAPN10       | 2   | 241526133 | 241538526 | 49    | 5      | 1065 | 3.2482 | 5.81E-04 | 0.636258 |
| SP100        | 2   | 231280871 | 231410317 | 338   | 36     | 1065 | 3.2306 | 6.18E-04 | 0.636258 |
| ZNF695       | 1   | 247108849 | 247171395 | 171   | 22     | 1065 | 3.2294 | 6.20E-04 | 0.636258 |
| ZNF670       | 1   | 247197940 | 247242115 | 185   | 16     | 1065 | 3.1827 | 7.30E-04 | 0.703469 |
| LTBR         | 12  | 6484534   | 6500737   | 6     | 2      | 1065 | 3.1684 | 7.66E-04 | 0.703469 |
| PPA1         | 10  | 71962586  | 71993667  | 97    | 13     | 1065 | 3.153  | 8.08E-04 | 0.704738 |
| PRR15L       | 17  | 46029333  | 46035252  | 18    | 5      | 1065 | 3.1321 | 8.68E-04 | 0.715969 |
| HOXB13       | 17  | 46802125  | 46806111  | 7     | 4      | 1065 | 3.1204 | 9.03E-04 | 0.715969 |
| OR7A17       | 19  | 14991238  | 14992167  | 6     | 3      | 1065 | 3.0935 | 9.89E-04 | 0.729106 |
| SERBP1       | 1   | 67873493  | 67896123  | 14    | 3      | 1065 | 3.0892 | 1.00E-03 | 0.729106 |
| DCAF11       | 14  | 24583906  | 24594451  | 14    | 3      | 1065 | 3.032  | 1.21E-03 | 0.75895  |
| ZNF302       | 19  | 35168553  | 35177302  | 28    | 5      | 1065 | 3.0303 | 1.22E-03 | 0.75895  |



|         |    |           |           |     |    |      |        |          |         |
|---------|----|-----------|-----------|-----|----|------|--------|----------|---------|
| GRTPI   | 13 | 113978505 | 114018463 | 78  | 10 | 1065 | 3.0267 | 1.24E-03 | 0.75895 |
| MICU3   | 8  | 16884747  | 16980148  | 234 | 24 | 1065 | 3.0164 | 1.28E-03 | 0.75895 |
| CCR3    | 3  | 46283872  | 46308197  | 54  | 7  | 1065 | 2.9855 | 1.42E-03 | 0.75895 |
| SPATS2L | 2  | 201170604 | 201346986 | 346 | 45 | 1065 | 2.9518 | 1.58E-03 | 0.75895 |
| KDM4D   | 11 | 94706845  | 94732678  | 48  | 9  | 1065 | 2.9355 | 1.67E-03 | 0.75895 |
| LSM5    | 7  | 32524945  | 32534870  | 39  | 6  | 1065 | 2.9331 | 1.68E-03 | 0.75895 |
| GAL3ST3 | 11 | 65808236  | 65816651  | 13  | 2  | 1065 | 2.908  | 1.82E-03 | 0.75895 |
| APC     | 5  | 112043202 | 112181936 | 224 | 20 | 1065 | 2.9076 | 1.82E-03 | 0.75895 |
| NTNG2   | 9  | 135037334 | 135118224 | 94  | 13 | 1065 | 2.9059 | 1.83E-03 | 0.75895 |
| TLDC1   | 16 | 84509966  | 84538366  | 151 | 23 | 1065 | 2.9041 | 1.84E-03 | 0.75895 |
| PK3CD   | 1  | 9711789   | 9789172   | 48  | 9  | 1065 | 2.8853 | 1.96E-03 | 0.75895 |
| CNIH2   | 11 | 66045672  | 66051685  | 4   | 2  | 1065 | 2.8844 | 1.96E-03 | 0.75895 |
| YIF1A   | 11 | 66052051  | 66056638  | 5   | 2  | 1065 | 2.8827 | 1.97E-03 | 0.75895 |
| SSC4D   | 7  | 76018646  | 76039012  | 70  | 7  | 1065 | 2.8816 | 1.98E-03 | 0.75895 |
| ANKMY1  | 2  | 241418839 | 241500472 | 214 | 33 | 1065 | 2.871  | 2.05E-03 | 0.75895 |
| CDC34   | 19 | 531720    | 542087    | 8   | 1  | 1065 | 2.8483 | 2.20E-03 | 0.75895 |
| MAATS1  | 3  | 119421869 | 119485949 | 94  | 11 | 1065 | 2.8437 | 2.23E-03 | 0.75895 |
| GML     | 8  | 143916217 | 143928262 | 44  | 6  | 1065 | 2.8416 | 2.24E-03 | 0.75895 |
| OR10H2  | 19 | 15838834  | 15839862  | 5   | 2  | 1065 | 2.8415 | 2.25E-03 | 0.75895 |
| PLA1A   | 3  | 119316695 | 119348658 | 101 | 8  | 1065 | 2.8408 | 2.25E-03 | 0.75895 |
| RAB27A  | 15 | 55495164  | 55582034  | 251 | 27 | 1065 | 2.8374 | 2.27E-03 | 0.75895 |
| SCN8A   | 12 | 51984050  | 52206648  | 282 | 21 | 1065 | 2.8371 | 2.28E-03 | 0.75895 |
| PDGFC   | 4  | 157682763 | 157892546 | 212 | 17 | 1065 | 2.8314 | 2.32E-03 | 0.75895 |
| ZNF79   | 9  | 130186653 | 130209525 | 47  | 5  | 1065 | 2.8292 | 2.33E-03 | 0.75895 |
| FIZ1    | 19 | 56102737  | 56110893  | 10  | 3  | 1065 | 2.8211 | 2.39E-03 | 0.75895 |
| HERC6   | 4  | 89299838  | 89364249  | 24  | 5  | 1065 | 2.808  | 2.49E-03 | 0.75895 |
| ZNF716  | 7  | 57509883  | 57533265  | 85  | 4  | 1065 | 2.8066 | 2.50E-03 | 0.75895 |
| SAMD4A  | 14 | 55033815  | 55260033  | 372 | 83 | 1065 | 2.8057 | 2.51E-03 | 0.75895 |
| CCDC3   | 10 | 12938625  | 13141762  | 729 | 96 | 1065 | 2.7976 | 2.57E-03 | 0.75895 |
| UCT3A1  | 5  | 35953191  | 36066639  | 276 | 33 | 1065 | 2.7913 | 2.62E-03 | 0.75895 |
| IL1R2   | 2  | 102608306 | 102644885 | 115 | 8  | 1065 | 2.7684 | 2.82E-03 | 0.75895 |
| RNF125  | 18 | 29598445  | 29653154  | 70  | 8  | 1065 | 2.7608 | 2.88E-03 | 0.75895 |
| HOXB6   | 17 | 46673099  | 46682343  | 16  | 6  | 1065 | 2.75   | 2.98E-03 | 0.75895 |

|          |    |           |           |     |    |      |        |          |         |
|----------|----|-----------|-----------|-----|----|------|--------|----------|---------|
| PNLIP    | 10 | 118305428 | 118327367 | 25  | 3  | 1065 | 2.7487 | 2.99E-03 | 0.75895 |
| SCN1B    | 19 | 35521555  | 35531353  | 7   | 1  | 1065 | 2.7413 | 3.06E-03 | 0.75895 |
| NAPB     | 20 | 23355156  | 23402156  | 157 | 13 | 1065 | 2.7387 | 3.08E-03 | 0.75895 |
| DVL2     | 17 | 7128661   | 7137867   | 9   | 3  | 1065 | 2.7363 | 3.11E-03 | 0.75895 |
| PRAC1    | 17 | 46799081  | 46799882  | 1   | 1  | 1065 | 2.732  | 3.15E-03 | 0.75895 |
| SPPL3    | 12 | 121200313 | 121342155 | 381 | 31 | 1065 | 2.7279 | 3.19E-03 | 0.75895 |
| MRPL18   | 6  | 160211492 | 160219461 | 35  | 4  | 1065 | 2.7202 | 3.26E-03 | 0.75895 |
| INSR     | 19 | 7112266   | 7294011   | 447 | 55 | 1065 | 2.7179 | 3.29E-03 | 0.75895 |
| LMAN1    | 18 | 56995055  | 57026508  | 77  | 8  | 1065 | 2.7178 | 3.29E-03 | 0.75895 |
| SRSF11   | 1  | 70671365  | 70717703  | 39  | 4  | 1065 | 2.7174 | 3.29E-03 | 0.75895 |
| MTNR1B   | 11 | 92702789  | 92715948  | 25  | 4  | 1065 | 2.7117 | 3.35E-03 | 0.75895 |
| TAAR9    | 6  | 132859427 | 132860475 | 4   | 2  | 1064 | 2.7083 | 3.38E-03 | 0.75895 |
| RPL12    | 9  | 130209953 | 130213711 | 7   | 1  | 1065 | 2.7077 | 3.39E-03 | 0.75895 |
| GB2      | 13 | 20761602  | 20768605  | 14  | 3  | 1065 | 2.7068 | 3.40E-03 | 0.75895 |
| TAS2R42  | 12 | 11338599  | 11339543  | 8   | 2  | 1065 | 2.7045 | 3.42E-03 | 0.75895 |
| SCRIB    | 8  | 144873090 | 144897890 | 30  | 4  | 1065 | 2.7028 | 3.44E-03 | 0.75895 |
| CMC1     | 3  | 28282838  | 28361264  | 115 | 11 | 1065 | 2.6979 | 3.49E-03 | 0.75895 |
| SAXO1    | 9  | 18927891  | 19033256  | 498 | 33 | 1065 | 2.6892 | 3.58E-03 | 0.75895 |
| ESM1     | 5  | 54273695  | 54281414  | 13  | 2  | 1065 | 2.6851 | 3.63E-03 | 0.75895 |
| LMTK3    | 19 | 48988528  | 49016446  | 26  | 2  | 1065 | 2.684  | 3.64E-03 | 0.75895 |
| ZP3      | 7  | 76026841  | 76071388  | 142 | 17 | 1065 | 2.681  | 3.67E-03 | 0.75895 |
| CPLX4    | 18 | 56962634  | 56985881  | 60  | 11 | 1065 | 2.6805 | 3.68E-03 | 0.75895 |
| CARD6    | 5  | 40841410  | 40855456  | 20  | 5  | 1065 | 2.6774 | 3.71E-03 | 0.75895 |
| ZCWPW2   | 3  | 28390372  | 28566633  | 188 | 12 | 1065 | 2.677  | 3.71E-03 | 0.75895 |
| DNAH6    | 2  | 84743579  | 85046713  | 556 | 21 | 1065 | 2.6713 | 3.78E-03 | 0.75895 |
| FAM32A   | 19 | 16296235  | 16302857  | 13  | 3  | 1065 | 2.6559 | 3.96E-03 | 0.75895 |
| APOBEC3A | 22 | 39348755  | 39359189  | 6   | 2  | 1065 | 2.6535 | 3.98E-03 | 0.75895 |
| KRT78    | 12 | 53231588  | 53242778  | 18  | 4  | 1065 | 2.6494 | 4.03E-03 | 0.75895 |
| SEMA5B   | 3  | 122628040 | 122747452 | 309 | 43 | 1065 | 2.6486 | 4.04E-03 | 0.75895 |
| PPP6R3   | 11 | 68228186  | 68382802  | 178 | 7  | 1065 | 2.6486 | 4.04E-03 | 0.75895 |
| CDKN1C   | 11 | 2904448   | 2907063   | 1   | 1  | 1065 | 2.6485 | 4.04E-03 | 0.75895 |
| MLEC     | 12 | 121124949 | 121139667 | 35  | 8  | 1065 | 2.6385 | 4.16E-03 | 0.75895 |
| C15orf62 | 15 | 41062159  | 41064647  | 2   | 1  | 1064 | 2.6377 | 4.17E-03 | 0.75895 |

|          |    |           |           |     |    |      |        |          |         |
|----------|----|-----------|-----------|-----|----|------|--------|----------|---------|
| SELL     | 14 | 81937891  | 82000205  | 41  | 7  | 1065 | 2.6327 | 4.24E-03 | 0.75895 |
| C17orf96 | 17 | 36827956  | 36831187  | 3   | 2  | 1065 | 2.6317 | 4.25E-03 | 0.75895 |
| LRSAM1   | 9  | 130213765 | 130265780 | 104 | 12 | 1065 | 2.6292 | 4.28E-03 | 0.75895 |
| SLC2A8   | 9  | 130159417 | 130170177 | 21  | 4  | 1065 | 2.6278 | 4.30E-03 | 0.75895 |
| IL22RA2  | 6  | 137464957 | 137494785 | 74  | 12 | 1065 | 2.6263 | 4.32E-03 | 0.75895 |
| C15orf53 | 15 | 38988799  | 38992239  | 19  | 4  | 1065 | 2.612  | 4.50E-03 | 0.75895 |
| C1orf27  | 1  | 186344890 | 186390503 | 65  | 10 | 1065 | 2.6116 | 4.51E-03 | 0.75895 |
| KLC2     | 11 | 66024765  | 66035332  | 12  | 3  | 1065 | 2.6049 | 4.59E-03 | 0.75895 |
| PUF60    | 8  | 144898514 | 144911556 | 15  | 2  | 1065 | 2.5962 | 4.71E-03 | 0.75895 |
| AFF3     | 2  | 100162326 | 100759037 | 936 | 73 | 1065 | 2.5954 | 4.72E-03 | 0.75895 |
| AGA      | 4  | 178351928 | 178363657 | 25  | 7  | 1065 | 2.5818 | 4.91E-03 | 0.75895 |
| FTM1     | 14 | 24600675  | 24602058  | 2   | 1  | 1065 | 2.5817 | 4.92E-03 | 0.75895 |
| WDR11    | 10 | 122610687 | 122669038 | 185 | 9  | 1065 | 2.5811 | 4.92E-03 | 0.75895 |
| LONRF1   | 8  | 12579406  | 12612992  | 72  | 6  | 1065 | 2.5755 | 5.00E-03 | 0.75895 |
| AHCTF1   | 1  | 247002400 | 247094726 | 127 | 13 | 1065 | 2.5738 | 5.03E-03 | 0.75895 |
| HERC5    | 4  | 89378181  | 89427334  | 15  | 3  | 1065 | 2.5729 | 5.04E-03 | 0.75895 |
| CWC15    | 11 | 94695787  | 94706776  | 23  | 6  | 1065 | 2.5723 | 5.05E-03 | 0.75895 |
| TMEM159  | 16 | 21169703  | 21191937  | 35  | 6  | 1065 | 2.5695 | 5.09E-03 | 0.75895 |
| ZPR1     | 11 | 116649276 | 116658739 | 20  | 6  | 1065 | 2.5686 | 5.11E-03 | 0.75895 |
| RSL24D1  | 15 | 55473512  | 55489231  | 48  | 6  | 1065 | 2.5672 | 5.13E-03 | 0.75895 |
| C16orf87 | 16 | 46835959  | 46865074  | 13  | 1  | 1065 | 2.566  | 5.14E-03 | 0.75895 |
| DNER     | 2  | 230222345 | 230579286 | 909 | 96 | 1065 | 2.5613 | 5.21E-03 | 0.75895 |
| COLCA2   | 11 | 111169271 | 111179460 | 23  | 4  | 1065 | 2.5604 | 5.23E-03 | 0.75895 |
| BTN1A1   | 6  | 26500577  | 26510653  | 18  | 3  | 1065 | 2.5543 | 5.32E-03 | 0.75895 |
| CHCHD5   | 2  | 113342023 | 113346617 | 10  | 3  | 1065 | 2.5487 | 5.41E-03 | 0.75895 |
| EMC9     | 14 | 24608081  | 24610837  | 2   | 1  | 1065 | 2.5468 | 5.44E-03 | 0.75895 |
| TOR1AIP1 | 1  | 179851177 | 179889212 | 87  | 9  | 1065 | 2.5446 | 5.47E-03 | 0.75895 |
| C4BPB    | 1  | 207262210 | 207273338 | 14  | 4  | 1065 | 2.5378 | 5.58E-03 | 0.75895 |
| KRT8     | 12 | 53290971  | 53343650  | 143 | 18 | 1065 | 2.5305 | 5.69E-03 | 0.75895 |
| DNAAF1   | 16 | 84178865  | 84211524  | 116 | 18 | 1065 | 2.5232 | 5.81E-03 | 0.75895 |
| ACD      | 16 | 67691415  | 67694718  | 4   | 2  | 1065 | 2.5184 | 5.90E-03 | 0.75895 |
| RASGEF1B | 4  | 82347547  | 82393082  | 63  | 9  | 1065 | 2.5162 | 5.93E-03 | 0.75895 |
| SIPALL1  | 14 | 71788108  | 72207761  | 424 | 25 | 1065 | 2.5129 | 5.99E-03 | 0.75895 |

|          |    |           |           |      |    |      |        |          |         |
|----------|----|-----------|-----------|------|----|------|--------|----------|---------|
| MAST1    | 19 | 12949259  | 12985766  | 49   | 3  | 1065 | 2.5091 | 6.05E-03 | 0.75895 |
| TPT1     | 13 | 45911005  | 45915505  | 9    | 2  | 1065 | 2.5064 | 6.10E-03 | 0.75895 |
| HMGNA4   | 6  | 26538572  | 26547165  | 15   | 2  | 1065 | 2.5057 | 6.11E-03 | 0.75895 |
| KIF5B    | 10 | 32297938  | 32345371  | 74   | 7  | 1065 | 2.5044 | 6.13E-03 | 0.75895 |
| CCDC141  | 2  | 179694484 | 179914841 | 519  | 59 | 1065 | 2.5021 | 6.17E-03 | 0.75895 |
| CPT1B    | 22 | 51007290  | 51017096  | 38   | 7  | 1065 | 2.5011 | 6.19E-03 | 0.75895 |
| ZFP57    | 6  | 29640169  | 29644931  | 23   | 8  | 1065 | 2.5007 | 6.20E-03 | 0.75895 |
| ACTA1    | 1  | 229566992 | 229569858 | 3    | 1  | 1065 | 2.4997 | 6.21E-03 | 0.75895 |
| COX19    | 7  | 1004486   | 1015235   | 14   | 3  | 1065 | 2.499  | 6.23E-03 | 0.75895 |
| MTERF2   | 12 | 107371069 | 107380944 | 19   | 7  | 1065 | 2.4966 | 6.27E-03 | 0.75895 |
| C14orf28 | 14 | 45366433  | 45376460  | 16   | 2  | 1064 | 2.4955 | 6.29E-03 | 0.75895 |
| DCLK3    | 3  | 36753913  | 36781352  | 45   | 10 | 1065 | 2.4954 | 6.29E-03 | 0.75895 |
| ALAD     | 9  | 116148592 | 116163618 | 9    | 2  | 1065 | 2.4922 | 6.35E-03 | 0.75895 |
| CA1      | 8  | 86240458  | 86290342  | 62   | 10 | 1065 | 2.4901 | 6.38E-03 | 0.75895 |
| CEP85L   | 6  | 118781935 | 119031238 | 584  | 32 | 1065 | 2.4901 | 6.39E-03 | 0.75895 |
| CADM2    | 3  | 85008133  | 86123579  | 2425 | 88 | 1065 | 2.4896 | 6.39E-03 | 0.75895 |
| ZNF850   | 19 | 37234380  | 37263717  | 63   | 8  | 1065 | 2.4893 | 6.40E-03 | 0.75895 |
| AP2M1    | 3  | 183892634 | 183901879 | 16   | 5  | 1065 | 2.4862 | 6.46E-03 | 0.75895 |
| DTX3L    | 3  | 122283085 | 122294050 | 12   | 5  | 1065 | 2.4861 | 6.46E-03 | 0.75895 |
| DZIP3    | 3  | 108308337 | 108413693 | 118  | 11 | 1065 | 2.4757 | 6.65E-03 | 0.75895 |
| AOAH     | 7  | 36552549  | 36764154  | 489  | 61 | 1065 | 2.4719 | 6.72E-03 | 0.75895 |
| TMEM55B  | 14 | 20926012  | 20929637  | 1    | 1  | 1065 | 2.4691 | 6.77E-03 | 0.75895 |
| C2CD3    | 11 | 73723759  | 73882064  | 203  | 14 | 1065 | 2.4636 | 6.88E-03 | 0.75895 |
| SPNS2    | 17 | 4402129   | 4443228   | 54   | 7  | 1065 | 2.4607 | 6.93E-03 | 0.75895 |
| CHKB     | 22 | 51017387  | 51021428  | 12   | 4  | 1065 | 2.4587 | 6.97E-03 | 0.75895 |
| C4orf22  | 4  | 81256861  | 81884910  | 916  | 45 | 1065 | 2.4586 | 6.97E-03 | 0.75895 |
| TMEM26   | 10 | 63166401  | 63213208  | 103  | 15 | 1065 | 2.4581 | 6.98E-03 | 0.75895 |
| TAAR8    | 6  | 132873832 | 132874860 | 1    | 1  | 1065 | 2.455  | 7.05E-03 | 0.75895 |
| AQP12B   | 2  | 241615835 | 241622317 | 3    | 2  | 1065 | 2.4547 | 7.05E-03 | 0.75895 |
| TAS2R50  | 12 | 11138512  | 11139511  | 3    | 2  | 1065 | 2.4532 | 7.08E-03 | 0.75895 |
| PRR4     | 12 | 10998448  | 11002075  | 8    | 3  | 1065 | 2.4483 | 7.18E-03 | 0.75895 |
| HOXB5    | 17 | 46668619  | 46671103  | 8    | 4  | 1065 | 2.4475 | 7.19E-03 | 0.75895 |
| KLK12    | 19 | 51532348  | 51538486  | 6    | 1  | 1065 | 2.4402 | 7.34E-03 | 0.75895 |

|         |    |           |           |     |    |      |        |          |         |
|---------|----|-----------|-----------|-----|----|------|--------|----------|---------|
| MYL4    | 17 | 45266728  | 45301045  | 60  | 12 | 1065 | 2.4352 | 7.44E-03 | 0.75895 |
| RAVER2  | 1  | 65210778  | 65298915  | 133 | 13 | 1065 | 2.4324 | 7.50E-03 | 0.75895 |
| CREB1   | 2  | 208394616 | 208470284 | 75  | 6  | 1065 | 2.4304 | 7.54E-03 | 0.75895 |
| POPDCC2 | 3  | 119360899 | 119379437 | 64  | 8  | 1065 | 2.4301 | 7.55E-03 | 0.75895 |
| EDIL3   | 5  | 83236414  | 83680685  | 660 | 74 | 1065 | 2.4284 | 7.58E-03 | 0.75895 |
| OR2B11  | 1  | 247614331 | 247615284 | 4   | 1  | 1065 | 2.4281 | 7.59E-03 | 0.75895 |
| GZF1    | 20 | 23342769  | 23353683  | 28  | 6  | 1065 | 2.4235 | 7.69E-03 | 0.75895 |
| TM9SF2  | 13 | 100153628 | 100216302 | 114 | 15 | 1065 | 2.423  | 7.70E-03 | 0.75895 |
| DNAJC17 | 15 | 41060067  | 41099676  | 48  | 5  | 1065 | 2.4201 | 7.76E-03 | 0.75895 |
| ACAP1   | 17 | 7239848   | 7254797   | 17  | 5  | 1065 | 2.4173 | 7.82E-03 | 0.75895 |
| LTP4    | 19 | 41099072  | 41135725  | 83  | 9  | 1065 | 2.4171 | 7.82E-03 | 0.75895 |
| COLCA1  | 11 | 111164114 | 111177104 | 30  | 4  | 1065 | 2.4146 | 7.88E-03 | 0.75895 |
| HOXB7   | 17 | 46684594  | 46688383  | 11  | 4  | 1065 | 2.4141 | 7.89E-03 | 0.75895 |
| TPM4    | 19 | 16178317  | 16213815  | 32  | 4  | 1065 | 2.4134 | 7.90E-03 | 0.75895 |
| MXRA7   | 17 | 74669748  | 74707056  | 106 | 11 | 1065 | 2.4099 | 7.98E-03 | 0.75895 |
| SCG2    | 2  | 224461658 | 224467217 | 3   | 1  | 1065 | 2.4084 | 8.01E-03 | 0.75895 |
| FBXO28  | 1  | 224301789 | 224349749 | 89  | 5  | 1065 | 2.4082 | 8.02E-03 | 0.75895 |
| NLRP5   | 19 | 56511092  | 56573176  | 259 | 43 | 1065 | 2.4074 | 8.03E-03 | 0.75895 |
| IL31RA  | 5  | 55147207  | 55218682  | 156 | 21 | 1065 | 2.4072 | 8.04E-03 | 0.75895 |
| SNAP23  | 15 | 42783442  | 42825259  | 46  | 4  | 1065 | 2.4067 | 8.05E-03 | 0.75895 |
| TAS2R7  | 12 | 10954131  | 10955226  | 1   | 1  | 1065 | 2.4051 | 8.08E-03 | 0.75895 |
| NMRAL1  | 16 | 4511690   | 4524896   | 39  | 3  | 1065 | 2.4007 | 8.18E-03 | 0.75895 |
| PRRG2   | 19 | 50084574  | 50094272  | 21  | 3  | 1065 | 2.398  | 8.24E-03 | 0.75895 |
| PFN2    | 3  | 149682691 | 149688741 | 7   | 3  | 1065 | 2.3972 | 8.26E-03 | 0.75895 |
| PNLDC1  | 6  | 160221281 | 160241736 | 47  | 8  | 1065 | 2.3962 | 8.28E-03 | 0.75895 |
| TPR     | 1  | 186280784 | 186344883 | 115 | 11 | 1065 | 2.3959 | 8.29E-03 | 0.75895 |
| IGL     | 22 | 22380474  | 23265085  | 738 | 73 | 1065 | 2.3953 | 8.30E-03 | 0.75895 |
| POLR3D  | 8  | 22102619  | 22108680  | 16  | 5  | 1065 | 2.3931 | 8.35E-03 | 0.75895 |
| TAF1C   | 16 | 84211453  | 84220676  | 44  | 9  | 1065 | 2.392  | 8.38E-03 | 0.75895 |
| VILL    | 3  | 38032217  | 38048676  | 41  | 5  | 1065 | 2.3912 | 8.40E-03 | 0.75895 |
| C8orf22 | 8  | 49966895  | 49988642  | 29  | 4  | 1065 | 2.3871 | 8.49E-03 | 0.75895 |
| ONECUT2 | 18 | 55102917  | 55158530  | 137 | 13 | 1065 | 2.3834 | 8.58E-03 | 0.75895 |
| ARHGFE5 | 7  | 144052489 | 144077725 | 8   | 1  | 1065 | 2.3825 | 8.60E-03 | 0.75895 |

|          |    |           |           |      |     |      |        |          |         |
|----------|----|-----------|-----------|------|-----|------|--------|----------|---------|
| DRG2     | 17 | 17991181  | 18011299  | 30   | 4   | 1065 | 2.3791 | 8.68E-03 | 0.75895 |
| SLC3A2   | 11 | 62623484  | 62656355  | 17   | 4   | 1065 | 2.3779 | 8.71E-03 | 0.75895 |
| CCRS     | 3  | 46411633  | 46417697  | 13   | 3   | 1065 | 2.3752 | 8.77E-03 | 0.75895 |
| CCR12    | 3  | 46448721  | 46454488  | 15   | 3   | 1065 | 2.3734 | 8.81E-03 | 0.75895 |
| IRG1     | 13 | 77522694  | 77532777  | 19   | 6   | 1065 | 2.3719 | 8.85E-03 | 0.75895 |
| PLD5     | 1  | 242251689 | 242687998 | 1238 | 120 | 1065 | 2.3678 | 8.95E-03 | 0.75895 |
| SLC30A8  | 8  | 117962512 | 118188953 | 333  | 26  | 1065 | 2.3664 | 8.98E-03 | 0.75895 |
| PHF23    | 17 | 7138347   | 7142825   | 3    | 1   | 1065 | 2.3653 | 9.01E-03 | 0.75895 |
| ATP6V1C2 | 2  | 10861775  | 10925236  | 161  | 22  | 1065 | 2.3646 | 9.03E-03 | 0.75895 |
| ZNF792   | 19 | 35447078  | 35455139  | 15   | 3   | 1065 | 2.3644 | 9.03E-03 | 0.75895 |
| OR4F15   | 15 | 102358390 | 102359328 | 1    | 1   | 1065 | 2.3639 | 9.04E-03 | 0.75895 |
| GNA15    | 19 | 3136191   | 3163766   | 55   | 9   | 1065 | 2.3627 | 9.07E-03 | 0.75895 |
| PRF1     | 10 | 72357104  | 72362531  | 10   | 3   | 1065 | 2.3617 | 9.10E-03 | 0.75895 |
| SNRPB    | 20 | 2442281   | 2451499   | 10   | 2   | 1065 | 2.3616 | 9.10E-03 | 0.75895 |
| DNASE2   | 19 | 12986025  | 12992409  | 5    | 1   | 1065 | 2.3602 | 9.13E-03 | 0.75895 |
| FGFR1OP  | 6  | 167412805 | 167458064 | 224  | 9   | 1065 | 2.3597 | 9.14E-03 | 0.75895 |

**Table S16.** MAGMA Gene-Test Results for SNP x AB42 GWAS for Hip. Slopes, covaried for APOE-ε4 (subset to unadjusted p < 0.05)

| GENE      | CHR | START     | STOP      | NSNPS | NPARAM | N    | ZSTAT  | P        | p.fdr     |
|-----------|-----|-----------|-----------|-------|--------|------|--------|----------|-----------|
| DPYD      | 1   | 97543299  | 98386615  | 1574  | 134    | 1058 | 4.5405 | 2.81E-06 | 0.048946  |
| COBL      | 7   | 51083909  | 51384515  | 480   | 40     | 1058 | 3.7376 | 9.29E-05 | 0.373287  |
| ISM1      | 20  | 13202418  | 13281297  | 202   | 25     | 1058 | 3.7235 | 9.82E-05 | 0.373287  |
| PACS1     | 11  | 65837747  | 66012218  | 225   | 14     | 1058 | 3.7185 | 1.00E-04 | 0.373287  |
| LOC101060 | 17  | 46712166  | 46724875  | 37    | 7      | 1058 | 3.6495 | 1.31E-04 | 0.373287  |
| TLDC1     | 16  | 84509966  | 84538366  | 151   | 23     | 1058 | 3.6388 | 1.37E-04 | 0.373287  |
| MICU3     | 8   | 16884747  | 16980148  | 234   | 24     | 1058 | 3.6156 | 1.50E-04 | 0.373287  |
| USH2A     | 1   | 215796236 | 216596738 | 1692  | 165    | 1058 | 3.5375 | 2.02E-04 | 0.440363  |
| HOXB9     | 17  | 46698518  | 46703835  | 14    | 4      | 1058 | 3.465  | 2.65E-04 | 0.471922  |
| OR10H2    | 19  | 15838834  | 15839862  | 5     | 2      | 1058 | 3.4411 | 2.90E-04 | 0.471922  |
| IL12RB2   | 1   | 67773047  | 67862583  | 199   | 15     | 1058 | 3.4338 | 2.98E-04 | 0.471922  |
| HOXB3     | 17  | 46626232  | 46667634  | 79    | 15     | 1058 | 3.3631 | 3.85E-04 | 0.5339413 |
| TOMM40    | 19  | 45394477  | 45406946  | 27    | 4      | 1058 | 3.3399 | 4.19E-04 | 0.5339413 |
| RAB27A    | 15  | 55495164  | 55582034  | 251   | 27     | 1058 | 3.3308 | 4.33E-04 | 0.5339413 |
| CAPN10    | 2   | 241526133 | 241538526 | 49    | 5      | 1058 | 3.269  | 5.40E-04 | 0.573415  |
| ZNF670    | 1   | 247197940 | 247242115 | 185   | 16     | 1058 | 3.2447 | 5.88E-04 | 0.573415  |
| NRL       | 14  | 24547902  | 24584223  | 27    | 7      | 1058 | 3.2054 | 6.74E-04 | 0.573415  |
| CDK5RAP3  | 17  | 46047894  | 46059152  | 28    | 4      | 1058 | 3.1859 | 7.22E-04 | 0.573415  |
| ZNF695    | 1   | 247108849 | 247171395 | 171   | 22     | 1058 | 3.1772 | 7.43E-04 | 0.573415  |
| SERBP1    | 1   | 67873493  | 67896123  | 14    | 3      | 1058 | 3.1713 | 7.59E-04 | 0.573415  |
| ACD       | 16  | 67691415  | 67694718  | 4     | 2      | 1058 | 3.1601 | 7.89E-04 | 0.573415  |
| IGL       | 22  | 22380474  | 23265085  | 738   | 73     | 1058 | 3.1539 | 8.06E-04 | 0.573415  |
| KDM4D     | 11  | 94706845  | 94732678  | 48    | 9      | 1058 | 3.1492 | 8.19E-04 | 0.573415  |
| AFF3      | 2   | 100162326 | 100759037 | 936   | 73     | 1058 | 3.1487 | 8.20E-04 | 0.573415  |
| VILL      | 3   | 38032217  | 38048676  | 41    | 5      | 1058 | 3.131  | 8.71E-04 | 0.573415  |
| ENDOV     | 17  | 78388965  | 78411886  | 37    | 7      | 1058 | 3.1283 | 8.79E-04 | 0.573415  |
| DCAF11    | 14  | 24583906  | 24594451  | 14    | 3      | 1058 | 3.1162 | 9.16E-04 | 0.573415  |
| FIZ1      | 19  | 56102737  | 56110893  | 10    | 3      | 1058 | 3.1107 | 9.33E-04 | 0.573415  |

|          |    |           |           |      |     |      |        |          |          |
|----------|----|-----------|-----------|------|-----|------|--------|----------|----------|
| LTBR     | 12 | 6484534   | 6500737   | 6    | 2   | 1058 | 3.1002 | 9.67E-04 | 0.573415 |
| SPNS2    | 17 | 4402129   | 4443228   | 54   | 7   | 1058 | 3.0927 | 9.92E-04 | 0.573415 |
| ILIR2    | 2  | 102608306 | 102644885 | 115  | 8   | 1058 | 3.0846 | 1.02E-03 | 0.573415 |
| CCR3     | 3  | 46283872  | 46308197  | 54   | 7   | 1058 | 3.0398 | 1.18E-03 | 0.602321 |
| PPA1     | 10 | 71962586  | 71993667  | 97   | 13  | 1058 | 3.0389 | 1.19E-03 | 0.602321 |
| ZNF302   | 19 | 35168553  | 35177302  | 28   | 5   | 1058 | 3.0362 | 1.20E-03 | 0.602321 |
| SP100    | 2  | 231280871 | 231410317 | 338  | 36  | 1058 | 3.0059 | 1.32E-03 | 0.602321 |
| CMC1     | 3  | 28282838  | 28361264  | 115  | 11  | 1058 | 3.0049 | 1.33E-03 | 0.602321 |
| APC      | 5  | 112043202 | 112181936 | 224  | 20  | 1058 | 2.9975 | 1.36E-03 | 0.602321 |
| SCRIB    | 8  | 144873090 | 144897890 | 30   | 4   | 1058 | 2.9963 | 1.37E-03 | 0.602321 |
| SAMD4A   | 14 | 55033815  | 55260033  | 372  | 83  | 1058 | 2.987  | 1.41E-03 | 0.602321 |
| NAPB     | 20 | 23355156  | 23402156  | 157  | 13  | 1058 | 2.9691 | 1.49E-03 | 0.602321 |
| GML      | 8  | 143916217 | 143928262 | 44   | 6   | 1058 | 2.9687 | 1.50E-03 | 0.602321 |
| RSL24D1  | 15 | 55473512  | 55489231  | 48   | 6   | 1058 | 2.965  | 1.51E-03 | 0.602321 |
| GAL3ST3  | 11 | 65808236  | 65816651  | 13   | 2   | 1058 | 2.9548 | 1.56E-03 | 0.602321 |
| C17orf96 | 17 | 36827956  | 36831187  | 3    | 2   | 1058 | 2.9548 | 1.56E-03 | 0.602321 |
| TM9SF2   | 13 | 100153628 | 100216302 | 114  | 15  | 1058 | 2.9515 | 1.58E-03 | 0.602321 |
| PK3CD    | 1  | 9711789   | 9789172   | 48   | 9   | 1058 | 2.9501 | 1.59E-03 | 0.602321 |
| C15orf53 | 15 | 38988799  | 38992239  | 19   | 4   | 1058 | 2.9417 | 1.63E-03 | 0.605574 |
| C14orf28 | 14 | 45366433  | 45376460  | 16   | 2   | 1057 | 2.934  | 1.67E-03 | 0.607928 |
| LMAN1    | 18 | 56995055  | 57026508  | 77   | 8   | 1058 | 2.9085 | 1.82E-03 | 0.646349 |
| ACA      | 4  | 178351928 | 178363657 | 25   | 7   | 1058 | 2.8924 | 1.91E-03 | 0.65373  |
| EDIL3    | 5  | 83236414  | 83680685  | 660  | 74  | 1058 | 2.8924 | 1.91E-03 | 0.65373  |
| PLA1A    | 3  | 119316695 | 119348658 | 101  | 8   | 1058 | 2.8789 | 2.00E-03 | 0.659488 |
| SPATS2L  | 2  | 201170604 | 201346986 | 346  | 45  | 1058 | 2.8698 | 2.05E-03 | 0.659488 |
| PUF60    | 8  | 144898514 | 144911556 | 15   | 2   | 1058 | 2.8684 | 2.06E-03 | 0.659488 |
| NRXN1    | 2  | 50145643  | 51259674  | 2995 | 193 | 1058 | 2.8613 | 2.11E-03 | 0.659488 |
| DNAH8    | 6  | 38683117  | 38998574  | 1015 | 58  | 1058 | 2.8601 | 2.12E-03 | 0.659488 |
| WDFY1    | 2  | 224740065 | 224810104 | 143  | 6   | 1058 | 2.8415 | 2.25E-03 | 0.678027 |
| TAAR9    | 6  | 132859427 | 132860475 | 4    | 2   | 1057 | 2.8383 | 2.27E-03 | 0.678027 |
| MAST1    | 19 | 12949259  | 12985766  | 49   | 3   | 1058 | 2.8212 | 2.39E-03 | 0.678027 |
| CNBD1    | 8  | 87878676  | 88394955  | 1148 | 71  | 1058 | 2.8196 | 2.40E-03 | 0.678027 |
| FAM32A   | 19 | 16296235  | 16302857  | 13   | 3   | 1058 | 2.8043 | 2.52E-03 | 0.678027 |
| SCG2     | 2  | 224461658 | 224467217 | 3    | 1   | 1058 | 2.8037 | 2.53E-03 | 0.678027 |
| HERC6    | 4  | 89299838  | 89364249  | 24   | 5   | 1058 | 2.7971 | 2.58E-03 | 0.678027 |



|          |    |           |           |      |     |      |        |          |          |
|----------|----|-----------|-----------|------|-----|------|--------|----------|----------|
| POPS     | 12 | 121016848 | 121019201 | 9    | 3   | 1058 | 2.7953 | 2.59E-03 | 0.678027 |
| AOAH     | 7  | 36552549  | 36764154  | 489  | 61  | 1058 | 2.7863 | 2.67E-03 | 0.678027 |
| CPLX4    | 18 | 56962634  | 56985881  | 60   | 11  | 1058 | 2.7832 | 2.69E-03 | 0.678027 |
| UCT3A1   | 5  | 35953191  | 36066639  | 276  | 33  | 1058 | 2.7796 | 2.72E-03 | 0.678027 |
| DHRS12   | 13 | 52330614  | 52379667  | 62   | 13  | 1058 | 2.7783 | 2.73E-03 | 0.678027 |
| TAS2R42  | 12 | 11338599  | 11339543  | 8    | 2   | 1058 | 2.7715 | 2.79E-03 | 0.678027 |
| SAXO1    | 9  | 18927891  | 19033256  | 498  | 33  | 1058 | 2.7672 | 2.83E-03 | 0.678027 |
| APOE     | 19 | 45409039  | 45412650  | 4    | 2   | 1058 | 2.766  | 2.84E-03 | 0.678027 |
| CWC15    | 11 | 94695787  | 94706776  | 23   | 6   | 1058 | 2.762  | 2.87E-03 | 0.678027 |
| MLEC     | 12 | 121124949 | 121139667 | 35   | 8   | 1058 | 2.7487 | 2.99E-03 | 0.678027 |
| LONRF1   | 8  | 12579406  | 12612992  | 72   | 6   | 1058 | 2.7409 | 3.06E-03 | 0.678027 |
| TOR1AIP1 | 1  | 179851177 | 179889212 | 87   | 9   | 1058 | 2.7323 | 3.14E-03 | 0.678027 |
| OR7A17   | 19 | 14991238  | 14992167  | 6    | 3   | 1058 | 2.721  | 3.25E-03 | 0.678027 |
| AQP12B   | 2  | 241615835 | 241622317 | 3    | 2   | 1058 | 2.721  | 3.25E-03 | 0.678027 |
| SCN1B    | 19 | 35521555  | 35531353  | 7    | 1   | 1058 | 2.7209 | 3.26E-03 | 0.678027 |
| ZCWPW2   | 3  | 28390372  | 28566633  | 188  | 12  | 1058 | 2.7176 | 3.29E-03 | 0.678027 |
| CARD6    | 5  | 40841410  | 40855456  | 20   | 5   | 1058 | 2.7163 | 3.30E-03 | 0.678027 |
| ZPR1     | 11 | 116649276 | 116658739 | 20   | 6   | 1058 | 2.714  | 3.32E-03 | 0.678027 |
| HOXB13   | 17 | 46802125  | 46806111  | 7    | 4   | 1058 | 2.7127 | 3.34E-03 | 0.678027 |
| NTNG2    | 9  | 135037334 | 135118224 | 94   | 13  | 1058 | 2.7098 | 3.37E-03 | 0.678027 |
| LSM5     | 7  | 32524945  | 32534870  | 39   | 6   | 1058 | 2.7096 | 3.37E-03 | 0.678027 |
| CNIH2    | 11 | 66045672  | 66051685  | 4    | 2   | 1058 | 2.707  | 3.39E-03 | 0.678027 |
| PLA2G4C  | 19 | 48551100  | 48614109  | 208  | 31  | 1058 | 2.7028 | 3.44E-03 | 0.678027 |
| COX19    | 7  | 1004486   | 1015235   | 14   | 3   | 1058 | 2.698  | 3.49E-03 | 0.678027 |
| RIPK3    | 14 | 24805227  | 24809242  | 16   | 2   | 1058 | 2.6969 | 3.50E-03 | 0.678027 |
| SRSF11   | 1  | 70671365  | 70717703  | 39   | 4   | 1058 | 2.6923 | 3.55E-03 | 0.678027 |
| FBXO28   | 1  | 224301789 | 224349749 | 89   | 5   | 1058 | 2.6915 | 3.56E-03 | 0.678027 |
| CCRS5    | 3  | 46411633  | 46417697  | 13   | 3   | 1058 | 2.6896 | 3.58E-03 | 0.678027 |
| MAATS1   | 3  | 119421869 | 119485949 | 94   | 11  | 1058 | 2.6853 | 3.62E-03 | 0.678027 |
| GATC     | 12 | 120884241 | 120901556 | 40   | 8   | 1058 | 2.6794 | 3.69E-03 | 0.678027 |
| SLC3A2   | 11 | 62623484  | 62656355  | 17   | 4   | 1058 | 2.6724 | 3.77E-03 | 0.678027 |
| C4orf22  | 4  | 81256861  | 81884910  | 916  | 45  | 1058 | 2.6657 | 3.84E-03 | 0.678027 |
| DZIP3    | 3  | 108308337 | 108413693 | 118  | 11  | 1058 | 2.6637 | 3.86E-03 | 0.678027 |
| C7orf50  | 7  | 1036623   | 1177911   | 509  | 35  | 1058 | 2.6621 | 3.88E-03 | 0.678027 |
| PLD5     | 1  | 242251689 | 242687998 | 1238 | 120 | 1058 | 2.662  | 3.88E-03 | 0.678027 |

|          |    |           |           |     |    |      |        |          |          |
|----------|----|-----------|-----------|-----|----|------|--------|----------|----------|
| SPL3     | 12 | 121200313 | 121342155 | 381 | 31 | 1058 | 2.6599 | 3.91E-03 | 0.678027 |
| GZF1     | 20 | 23342769  | 23353683  | 28  | 6  | 1058 | 2.6482 | 4.05E-03 | 0.678027 |
| MKRN2OS  | 3  | 12581280  | 12586963  | 11  | 3  | 1058 | 2.6442 | 4.09E-03 | 0.678027 |
| CPT1B    | 22 | 51007290  | 51017096  | 38  | 7  | 1058 | 2.642  | 4.12E-03 | 0.678027 |
| MBTPS1   | 16 | 84087368  | 84150517  | 225 | 25 | 1058 | 2.6386 | 4.16E-03 | 0.678027 |
| PRR15L   | 17 | 46029333  | 46035252  | 18  | 5  | 1058 | 2.6281 | 4.29E-03 | 0.678027 |
| YIF1A    | 11 | 66052051  | 66056638  | 5   | 2  | 1058 | 2.6253 | 4.33E-03 | 0.678027 |
| RLTPR    | 16 | 67679030  | 67691472  | 14  | 3  | 1058 | 2.6221 | 4.37E-03 | 0.678027 |
| FAM160B1 | 10 | 116581503 | 116659586 | 197 | 14 | 1058 | 2.6184 | 4.42E-03 | 0.678027 |
| C4BPB    | 1  | 207262210 | 207273338 | 14  | 4  | 1058 | 2.6076 | 4.56E-03 | 0.678027 |
| IL22RA2  | 6  | 137464957 | 137494785 | 74  | 12 | 1058 | 2.6027 | 4.62E-03 | 0.678027 |
| KCND3    | 1  | 112318444 | 112532147 | 564 | 90 | 1058 | 2.597  | 4.70E-03 | 0.678027 |
| HACD1    | 10 | 17631031  | 17659383  | 92  | 14 | 1058 | 2.5966 | 4.71E-03 | 0.678027 |
| DVL2     | 17 | 7128661   | 7137867   | 9   | 3  | 1058 | 2.5944 | 4.74E-03 | 0.678027 |
| SEMA5B   | 3  | 122628040 | 122747452 | 309 | 43 | 1058 | 2.5932 | 4.75E-03 | 0.678027 |
| GJB2     | 13 | 20761602  | 20768605  | 14  | 3  | 1058 | 2.5915 | 4.78E-03 | 0.678027 |
| OR10H3   | 19 | 15852203  | 15853153  | 7   | 3  | 1058 | 2.5901 | 4.80E-03 | 0.678027 |
| ENKD1    | 16 | 67696850  | 67700628  | 1   | 1  | 1058 | 2.5889 | 4.81E-03 | 0.678027 |
| ACAP1    | 17 | 7239848   | 7254797   | 17  | 5  | 1058 | 2.5885 | 4.82E-03 | 0.678027 |
| CDC34    | 19 | 531720    | 542087    | 8   | 1  | 1058 | 2.5877 | 4.83E-03 | 0.678027 |
| BTN1A1   | 6  | 26500577  | 26510653  | 18  | 3  | 1058 | 2.5876 | 4.83E-03 | 0.678027 |
| C7       | 5  | 40909599  | 40983041  | 265 | 26 | 1058 | 2.5875 | 4.83E-03 | 0.678027 |
| SEMA6B   | 19 | 4542600   | 4559771   | 14  | 5  | 1058 | 2.5791 | 4.95E-03 | 0.678027 |
| DTX3L    | 3  | 122283085 | 122294050 | 12  | 5  | 1058 | 2.5717 | 5.06E-03 | 0.678027 |
| NPAP1    | 15 | 24920541  | 24928593  | 20  | 5  | 1058 | 2.5714 | 5.06E-03 | 0.678027 |
| HERC5    | 4  | 89378181  | 89427334  | 15  | 3  | 1058 | 2.5709 | 5.07E-03 | 0.678027 |
| SCN8A    | 12 | 51984050  | 52206648  | 282 | 21 | 1058 | 2.5632 | 5.19E-03 | 0.678027 |
| NXF1     | 11 | 62559597  | 62572964  | 6   | 3  | 1058 | 2.5609 | 5.22E-03 | 0.678027 |
| LTPP4    | 19 | 41099072  | 41135725  | 83  | 9  | 1058 | 2.5556 | 5.30E-03 | 0.678027 |
| ALAD     | 9  | 116148592 | 116163618 | 9   | 2  | 1058 | 2.5525 | 5.35E-03 | 0.678027 |
| ARHGFF5  | 7  | 144052489 | 144077725 | 8   | 1  | 1058 | 2.5506 | 5.38E-03 | 0.678027 |
| DNASE2   | 19 | 12986025  | 12992409  | 5   | 1  | 1058 | 2.5497 | 5.39E-03 | 0.678027 |
| PHOX2A   | 11 | 71950121  | 71955220  | 4   | 1  | 1058 | 2.5484 | 5.41E-03 | 0.678027 |
| CHKB     | 22 | 51017387  | 51021428  | 12  | 4  | 1058 | 2.5391 | 5.56E-03 | 0.678027 |
| OR10H1   | 19 | 15917817  | 15918936  | 3   | 2  | 1058 | 2.5375 | 5.58E-03 | 0.678027 |

|          |    |           |           |      |     |      |        |          |          |
|----------|----|-----------|-----------|------|-----|------|--------|----------|----------|
| DNAH6    | 2  | 84743579  | 85046713  | 556  | 21  | 1058 | 2.5354 | 5.62E-03 | 0.678027 |
| PPP4R1   | 18 | 9546789   | 9614605   | 157  | 17  | 1058 | 2.5343 | 5.63E-03 | 0.678027 |
| OR2B11   | 1  | 247614331 | 247615284 | 4    | 1   | 1058 | 2.5342 | 5.63E-03 | 0.678027 |
| EPST11   | 13 | 43460524  | 43566407  | 282  | 39  | 1058 | 2.5334 | 5.65E-03 | 0.678027 |
| HMGNA4   | 6  | 26538572  | 26547165  | 15   | 2   | 1058 | 2.5325 | 5.66E-03 | 0.678027 |
| SVIL     | 10 | 29746274  | 30025864  | 968  | 104 | 1058 | 2.5311 | 5.68E-03 | 0.678027 |
| LDLR     | 19 | 11200037  | 11244506  | 127  | 17  | 1058 | 2.53   | 5.70E-03 | 0.678027 |
| PAQR6    | 1  | 156213112 | 156217908 | 3    | 2   | 1058 | 2.5289 | 5.72E-03 | 0.678027 |
| OSBP2    | 22 | 31089769  | 31303811  | 434  | 49  | 1058 | 2.524  | 5.80E-03 | 0.678027 |
| IRS1     | 2  | 227596033 | 227664545 | 109  | 7   | 1058 | 2.5225 | 5.83E-03 | 0.678027 |
| SGSM1    | 22 | 25202136  | 25322813  | 349  | 50  | 1058 | 2.522  | 5.83E-03 | 0.678027 |
| KLF17    | 1  | 44513987  | 44600812  | 257  | 27  | 1058 | 2.5207 | 5.86E-03 | 0.678027 |
| TMPRSS2  | 21 | 42836236  | 42880085  | 139  | 18  | 1058 | 2.5204 | 5.86E-03 | 0.678027 |
| RBP1     | 3  | 139236276 | 139258671 | 54   | 11  | 1058 | 2.519  | 5.88E-03 | 0.678027 |
| MRPL16   | 11 | 59573608  | 59578345  | 2    | 1   | 1058 | 2.5173 | 5.91E-03 | 0.678027 |
| EMC9     | 14 | 24608081  | 24610837  | 2    | 1   | 1058 | 2.5152 | 5.95E-03 | 0.678027 |
| CTCF     | 16 | 67596310  | 67673088  | 63   | 7   | 1058 | 2.5149 | 5.95E-03 | 0.678027 |
| KRT78    | 12 | 53231588  | 53242778  | 18   | 4   | 1058 | 2.5138 | 5.97E-03 | 0.678027 |
| SYNPO2L  | 10 | 75404639  | 75415832  | 11   | 2   | 1058 | 2.5133 | 5.98E-03 | 0.678027 |
| NAV3     | 12 | 78224685  | 78606790  | 1011 | 89  | 1058 | 2.5123 | 6.00E-03 | 0.678027 |
| MTERF2   | 12 | 107371069 | 107380944 | 19   | 7   | 1058 | 2.5112 | 6.02E-03 | 0.678027 |
| HOXB6    | 17 | 46673099  | 46682343  | 16   | 6   | 1058 | 2.5105 | 6.03E-03 | 0.678027 |
| MXRA7    | 17 | 74669748  | 74707056  | 106  | 11  | 1058 | 2.5074 | 6.08E-03 | 0.678027 |
| C1orf27  | 1  | 186344890 | 186390503 | 65   | 10  | 1058 | 2.5048 | 6.13E-03 | 0.678027 |
| KLC2     | 11 | 66024765  | 66035332  | 12   | 3   | 1058 | 2.5035 | 6.15E-03 | 0.678027 |
| CACNG3   | 16 | 24266874  | 24373737  | 262  | 44  | 1058 | 2.5016 | 6.18E-03 | 0.678027 |
| CD164    | 6  | 109687717 | 109703762 | 34   | 4   | 1058 | 2.4968 | 6.27E-03 | 0.678562 |
| AMBP     | 9  | 116822407 | 116840752 | 37   | 7   | 1058 | 2.496  | 6.28E-03 | 0.678562 |
| GRTPI    | 13 | 113978505 | 114018463 | 78   | 10  | 1058 | 2.4931 | 6.33E-03 | 0.678562 |
| TAAR8    | 6  | 132873832 | 132874860 | 1    | 1   | 1058 | 2.4925 | 6.34E-03 | 0.678562 |
| PDGFC    | 4  | 157682763 | 157892546 | 212  | 17  | 1058 | 2.4889 | 6.41E-03 | 0.678562 |
| PSMD9    | 12 | 122326637 | 122355771 | 55   | 9   | 1058 | 2.4859 | 6.46E-03 | 0.678562 |
| ADGRE1   | 19 | 6887560   | 6940464   | 231  | 18  | 1058 | 2.4835 | 6.50E-03 | 0.678562 |
| CA1      | 8  | 86240458  | 86290342  | 62   | 10  | 1058 | 2.4783 | 6.60E-03 | 0.678562 |
| SLC25A16 | 10 | 70242090  | 70287280  | 141  | 11  | 1058 | 2.4726 | 6.71E-03 | 0.678562 |

|          |    |           |           |     |    |      |        |          |          |
|----------|----|-----------|-----------|-----|----|------|--------|----------|----------|
| CCDC3    | 10 | 12938625  | 13141762  | 729 | 96 | 1058 | 2.4697 | 6.76E-03 | 0.678562 |
| ESM1     | 5  | 54273695  | 54281414  | 13  | 2  | 1058 | 2.4683 | 6.79E-03 | 0.678562 |
| ANXA2    | 15 | 60639350  | 60690185  | 80  | 11 | 1058 | 2.4676 | 6.80E-03 | 0.678562 |
| DYNLL1   | 12 | 120907660 | 120936298 | 72  | 10 | 1058 | 2.4672 | 6.81E-03 | 0.678562 |
| FITM1    | 14 | 24600675  | 24602058  | 2   | 1  | 1058 | 2.4658 | 6.84E-03 | 0.678562 |
| TAS2R50  | 12 | 11138512  | 11139511  | 3   | 2  | 1058 | 2.4644 | 6.86E-03 | 0.678562 |
| CST11    | 20 | 23431041  | 23433482  | 3   | 2  | 1058 | 2.4626 | 6.90E-03 | 0.678562 |
| RNF44    | 5  | 175953700 | 175965026 | 5   | 2  | 1058 | 2.4616 | 6.92E-03 | 0.678562 |
| PPP6R3   | 11 | 68228186  | 68382802  | 178 | 7  | 1058 | 2.4611 | 6.92E-03 | 0.678562 |
| CHCHD5   | 2  | 113342023 | 113346617 | 10  | 3  | 1058 | 2.4609 | 6.93E-03 | 0.678562 |
| ZNF850   | 19 | 37234380  | 37263717  | 63  | 8  | 1058 | 2.4591 | 6.96E-03 | 0.678562 |
| ZNF567   | 19 | 37178466  | 37212428  | 63  | 5  | 1058 | 2.4546 | 7.05E-03 | 0.679622 |
| CKMT2    | 5  | 80528605  | 80562217  | 73  | 7  | 1058 | 2.4501 | 7.14E-03 | 0.679622 |
| RNF125   | 18 | 29598445  | 29653154  | 70  | 8  | 1058 | 2.447  | 7.20E-03 | 0.679622 |
| DNAAF1   | 16 | 84178865  | 84211524  | 116 | 18 | 1058 | 2.4434 | 7.27E-03 | 0.679622 |
| C15orf62 | 15 | 41062159  | 41064647  | 2   | 1  | 1057 | 2.4411 | 7.32E-03 | 0.679622 |
| SOS2     | 14 | 50583846  | 50698596  | 268 | 19 | 1058 | 2.4399 | 7.35E-03 | 0.679622 |
| ZNF704   | 8  | 81540686  | 81787016  | 213 | 10 | 1058 | 2.4397 | 7.35E-03 | 0.679622 |
| BMP2     | 20 | 6748745   | 6760910   | 12  | 3  | 1058 | 2.4365 | 7.41E-03 | 0.679622 |
| PPL6     | 6  | 109711418 | 109762374 | 106 | 9  | 1058 | 2.4356 | 7.43E-03 | 0.679622 |
| TAF6L    | 11 | 62538775  | 62554814  | 13  | 3  | 1058 | 2.4302 | 7.55E-03 | 0.679622 |
| UFSP2    | 4  | 186320691 | 186347139 | 65  | 10 | 1058 | 2.4295 | 7.56E-03 | 0.679622 |
| TIMP2    | 17 | 76849059  | 76921472  | 226 | 24 | 1058 | 2.4274 | 7.60E-03 | 0.679622 |
| BCDIN3D  | 12 | 50229826  | 50236912  | 13  | 4  | 1058 | 2.427  | 7.61E-03 | 0.679622 |
| ONECUT2  | 18 | 55102917  | 55158530  | 137 | 13 | 1058 | 2.4267 | 7.62E-03 | 0.679622 |
| OR10K1   | 1  | 158435352 | 158436293 | 1   | 1  | 1058 | 2.4257 | 7.64E-03 | 0.679622 |
| GPR146   | 7  | 1084218   | 1098905   | 79  | 8  | 1058 | 2.4235 | 7.69E-03 | 0.679622 |
| FGFR1OP  | 6  | 167412805 | 167458064 | 224 | 9  | 1058 | 2.4203 | 7.75E-03 | 0.679622 |
| 11-Mar   | 5  | 16067474  | 16179897  | 130 | 13 | 1058 | 2.4194 | 7.77E-03 | 0.679622 |
| ZSCAN1   | 19 | 58545434  | 58565999  | 16  | 2  | 1058 | 2.419  | 7.78E-03 | 0.679622 |
| TAS2R7   | 12 | 10954131  | 10955226  | 1   | 1  | 1058 | 2.4166 | 7.83E-03 | 0.679622 |
| MRPL18   | 6  | 160211492 | 160219461 | 35  | 4  | 1058 | 2.415  | 7.87E-03 | 0.679622 |
| HOXB5    | 17 | 46668619  | 46671103  | 8   | 4  | 1058 | 2.4136 | 7.90E-03 | 0.679622 |
| SMG5     | 1  | 156219015 | 156252676 | 66  | 7  | 1058 | 2.4132 | 7.91E-03 | 0.679622 |
| FAM65A   | 16 | 67562717  | 67580691  | 17  | 4  | 1058 | 2.41   | 7.98E-03 | 0.679622 |

|        |    |           |           |     |    |      |        |          |          |
|--------|----|-----------|-----------|-----|----|------|--------|----------|----------|
| PRSS16 | 6  | 27215480  | 27224399  | 18  | 6  | 1058 | 2.4048 | 8.09E-03 | 0.679622 |
| KIF2A  | 5  | 61601989  | 61683011  | 159 | 12 | 1058 | 2.4032 | 8.13E-03 | 0.679622 |
| WDR11  | 10 | 122610687 | 122669038 | 185 | 9  | 1058 | 2.4031 | 8.13E-03 | 0.679622 |
| CCRL2  | 3  | 46448721  | 46454488  | 15  | 3  | 1058 | 2.3986 | 8.23E-03 | 0.679622 |

Table S17. MAGMA Pathway-Test Results for SNP x AB42 GWAS for Hip Slopes (subset to unadjusted p < 0.05)

| FULL_NAME                                                                                               | NGENES | BETA    | BETA_STD | SE       | P        | pAdj     |
|---------------------------------------------------------------------------------------------------------|--------|---------|----------|----------|----------|----------|
| CO_HEMATOPOIETIC_PROGENITOR_CELL_DIFFERENTIATION                                                        | 152    | 0.22024 | 0.020471 | 0.066132 | 0.000435 | 0.845575 |
| CO_REGULATION_OF_DOUBLE_STRAND_BREAK_REPAIR                                                             | 58     | 0.3268  | 0.018815 | 0.098706 | 0.000466 | 0.845575 |
| CO_STAT_FAMILY_PROTEIN_BINDING                                                                          | 7      | 0.80422 | 0.016109 | 0.24481  | 0.000511 | 0.845575 |
| CO_CENTRAL_ELEMENT                                                                                      | 7      | 1.0629  | 0.02129  | 0.32526  | 0.000543 | 0.845575 |
| REACTOME_DEGRADATION_OF_BETA_CATENIN_BY_THE_DESTRUCTION_COMPLEX                                         | 77     | 0.30598 | 0.020286 | 0.093733 | 0.00055  | 0.845575 |
| CO_SCF_DEPENDENT_PROTEASOMAL_UBIQUITIN_DEPENDENT_PROTEIN_CATABOLIC_PROCESS                              | 83     | 0.2806  | 0.019311 | 0.087299 | 0.000655 | 0.845575 |
| CO_POSITIVE_REGULATION_OF_ARR2_3_COMPLEX_MEDIATED_ACTIN_NUCLEATION                                      | 7      | 0.9234  | 0.018496 | 0.29026  | 0.000734 | 0.845575 |
| CO_PROTEN_LOCALIZATION_TO_CELL_CORTEX                                                                   | 10     | 0.75214 | 0.018005 | 0.23928  | 0.000837 | 0.845575 |
| REACTOME_NEF_MEDIATED_CD8_DOWN_REGULATION                                                               | 7      | 0.79415 | 0.015907 | 0.25291  | 0.000846 | 0.845575 |
| CO_CELLULAR_RESPONSE_TO_PROSTAGLANDIN_E_STIMULUS                                                        | 15     | 0.73631 | 0.021585 | 0.23593  | 0.000903 | 0.845575 |
| CO_NEGATIVE_REGULATION_OF_CELL_CYCLE_PHASE_TRANSITION                                                   | 220    | 0.16786 | 0.018734 | 0.054026 | 0.000946 | 0.845575 |
| REACTOME_TRANSCRIPTIONAL_REGULATION_BY_RUNX2                                                            | 108    | 0.24359 | 0.01911  | 0.079302 | 0.001066 | 0.845575 |
| CO_POSITIVE_REGULATION_OF_ACTIN_NUCLEATION                                                              | 16     | 0.59016 | 0.017867 | 0.19278  | 0.001104 | 0.845575 |
| CO_TUBE_CLOSURE                                                                                         | 20     | 0.59595 | 0.02017  | 0.19674  | 0.001229 | 0.845575 |
| CO_CELLULAR_RESPONSE_TO_PROSTAGLANDIN_STIMULUS                                                          | 85     | 0.26895 | 0.018731 | 0.088988 | 0.001256 | 0.845575 |
| CO_PROTEN_KINASE_ACTIVITY                                                                               | 21     | 0.60684 | 0.021045 | 0.2011   | 0.001276 | 0.845575 |
| BIOCARTA_AHSP_PATHWAY                                                                                   | 536    | 0.1009  | 0.017416 | 0.033567 | 0.001326 | 0.845575 |
| GO_MRE11_COMPLEX                                                                                        | 9      | 0.66923 | 0.015199 | 0.2227   | 0.00133  | 0.845575 |
| CO_2_ACYLGlycerol_O_Acyltransferase_Activity                                                            | 5      | 0.89506 | 0.015153 | 0.29943  | 0.001401 | 0.845575 |
| GO_PROTEN_SERINE_THREONINE_KINASE_Activity                                                              | 5      | 1.1969  | 0.020263 | 0.40242  | 0.001471 | 0.845575 |
| REACTOME_CROSS_PRESENTATION_OF_PARTICULATE_EXOGENOUS_ANTIGENS_PHAGOSOMES                                | 391    | 0.11398 | 0.016873 | 0.03861  | 0.001581 | 0.845575 |
| REACTOME_NEF_MEDIATED_CD4_DOWN_REGULATION                                                               | 6      | 0.89152 | 0.016533 | 0.30299  | 0.001631 | 0.845575 |
| REACTOME_RETROGRADE_NEUROTROPHIN_SIGNALING                                                              | 14     | 0.57996 | 0.016425 | 0.19853  | 0.001745 | 0.845575 |
| REACTOME_GAP_JUNCTION_TRAFFICKING_AND_REGULATION                                                        | 39     | 0.38006 | 0.017952 | 0.13056  | 0.001804 | 0.845575 |
| CO_CALCIIUM_CATION_ANTIPORTER_Activity                                                                  | 9      | 0.85541 | 0.019427 | 0.29694  | 0.001987 | 0.845575 |
| GO_MITOTIC_DNA_INTEGRITY_CHECKPOINT                                                                     | 98     | 0.21999 | 0.016444 | 0.076504 | 0.00202  | 0.845575 |
| REACTOME_SCF_SKP2_MEDIATED_DEGRADATION_OF_P27_P21                                                       | 56     | 0.29029 | 0.016423 | 0.10272  | 0.002359 | 0.845575 |
| CO_ATP_TRANSMEMBRANE_TRANSPORTER_Activity                                                               | 8      | 0.75413 | 0.016148 | 0.26745  | 0.002406 | 0.845575 |
| CO_PHOSPHORUS_OXYGEN_LYASE_Activity                                                                     | 18     | 0.53352 | 0.017131 | 0.1898   | 0.002473 | 0.845575 |
| CO_REGULATION_OF_STEM_CELL_DIFFERENTIATION                                                              | 105    | 0.21631 | 0.016734 | 0.07696  | 0.002475 | 0.845575 |
| CO_NEURON_PROJECTION_MAINTENANCE                                                                        | 9      | 0.64119 | 0.014562 | 0.2287   | 0.00253  | 0.845575 |
| CO_INNATE_IMMUNE_RESPONSE_IN_MUCOSA                                                                     | 17     | 0.53994 | 0.016849 | 0.19329  | 0.002611 | 0.845575 |
| REACTOME_HEM_BIOSYNTHESIS                                                                               | 10     | 0.64196 | 0.015368 | 0.22982  | 0.002612 | 0.845575 |
| REACTOME_NEF_MEDIATES_DOWN_MODULATION_OF_CELL_SURFACE_RECEPTORS_BY_RECRUITING_THEM_TO_CLATHRIN_ADAPTERS | 20     | 0.40439 | 0.013686 | 0.14524  | 0.002686 | 0.845575 |
| CO_RESPONSE_TO_PROSTAGLANDIN                                                                            | 28     | 0.46859 | 0.018761 | 0.16896  | 0.002778 | 0.845575 |
| REACTOME_CYCLIN_A_CDK2_ASSOCIATED_EVENTS_AT_S_PHASE_ENTRY                                               | 81     | 0.22591 | 0.01536  | 0.081556 | 0.002806 | 0.845575 |
| CO_RECEPTOR_GUANYLYL_CYCLASE_SIGNALING_PATHWAY                                                          | 9      | 0.62066 | 0.014096 | 0.22471  | 0.002875 | 0.845575 |
| CO_ACTIVATION_OF_JNK_Activity                                                                           | 10     | 0.66128 | 0.01583  | 0.23955  | 0.002889 | 0.845575 |
| CO_RETINAL_BIPOLAR_NEURON_DIFFERENTIATION                                                               | 5      | 1.0574  | 0.017901 | 0.38436  | 0.002974 | 0.845575 |
| CO_INSULIN_RECEPTOR_COMPLEX                                                                             | 5      | 1.1613  | 0.019661 | 0.42259  | 0.003001 | 0.845575 |
| CO_SCAR_COMPLEX                                                                                         | 8      | 0.83541 | 0.017888 | 0.30451  | 0.003044 | 0.845575 |
| REACTOME_TCF_DEPENDENT_SIGNALING_IN_RESPONSE_TO_WNT                                                     | 197    | 0.15571 | 0.016456 | 0.056921 | 0.003117 | 0.845575 |
| CO_PEROXISOME_TARGETING_SEQUENCE_BINDING                                                                | 4      | 0.98719 | 0.014949 | 0.36131  | 0.003149 | 0.845575 |
| CO_PIRNA_BIOSYNTHETIC_PROCESS                                                                           | 5      | 0.85526 | 0.014479 | 0.3131   | 0.003155 | 0.845575 |
| CO_REGULATION_OF_DEFENSE_RESPONSE_TO_VIRUS_BY_VIRUS                                                     | 28     | 0.35297 | 0.014132 | 0.12973  | 0.00326  | 0.845575 |
| CO_ORSONIZATION                                                                                         | 11     | 0.73146 | 0.018364 | 0.26927  | 0.003303 | 0.845575 |
| CO_POSITIVE_REGULATION_OF_VIRAL_ENTRY_INTO_HOST_CELL                                                    | 9      | 0.62106 | 0.014105 | 0.22914  | 0.003364 | 0.845575 |

|                                                                                     |     |          |          |          |          |          |
|-------------------------------------------------------------------------------------|-----|----------|----------|----------|----------|----------|
| CO_PROTEIN_POLYUBIQUITINATION                                                       | 279 | 0.12999  | 0.01631  | 0.048212 | 0.00351  | 0.845575 |
| CO_VITAMIN_A_METABOLIC_PROCESS                                                      | 7   | 0.75037  | 0.01503  | 0.27955  | 0.003639 | 0.845575 |
| CO_ORGAN_OR_TISSUE_SPECIFIC_IMMUNE_RESPONSE                                         | 31  | 0.37337  | 0.015727 | 0.13931  | 0.003684 | 0.845575 |
| REACTOME_METABOLISM_OF_PORPHYRINS                                                   | 15  | 0.51938  | 0.015225 | 0.19386  | 0.003694 | 0.845575 |
| CO_PROTEASOME_REGULATORY_PARTICLE_BASE_SUBCOMPLEX                                   | 11  | 0.69253  | 0.017387 | 0.25858  | 0.003705 | 0.845575 |
| CO_STEROID_HORMONE_BINDING                                                          | 6   | 0.7946   | 0.014736 | 0.29715  | 0.003751 | 0.845575 |
| REACTOME_NEGATIVE_REGULATION_OF_NOTCH4_SIGNALING                                    | 50  | 0.31062  | 0.016608 | 0.11663  | 0.003875 | 0.846261 |
| CO_MODIFICATION_DEPENDENT_PROTEIN_BINDING                                           | 117 | 0.18995  | 0.015506 | 0.07148  | 0.003942 | 0.846261 |
| CO_NEGATIVE_REGULATION_OF_PROTEIN_LOCALIZATION_TO_CELL_PERIPHERY                    | 24  | 0.36621  | 0.013576 | 0.13796  | 0.003977 | 0.846261 |
| REACTOME_REGULATION_OF_RUNX2_EXPRESSION_AND_ACTIVITY                                | 69  | 0.26604  | 0.016701 | 0.1004   | 0.004032 | 0.846261 |
| PID_INTEGRINS_PATHWAY                                                               | 15  | 0.53198  | 0.015595 | 0.20249  | 0.004308 | 0.858227 |
| CO_MITOCHONDRIAL_RESPIRATORY_CHAIN_COMPLEX_III_ASSEMBLY                             | 9   | 0.60341  | 0.013704 | 0.22291  | 0.004343 | 0.858227 |
| CO_GOLGI_RIBBON_FORMATION                                                           | 12  | 0.60138  | 0.01577  | 0.23245  | 0.004843 | 0.858227 |
| CO_NEGATIVE_REGULATION_OF_PROTEIN_LOCALIZATION_TO_MEMBRANE                          | 28  | 0.33585  | 0.013446 | 0.12982  | 0.004844 | 0.858227 |
| CO_NEGATIVE_REGULATION_OF_MITOTIC_CELL_CYCLE                                        | 285 | 0.12077  | 0.015313 | 0.046771 | 0.004912 | 0.858227 |
| BIOCARTA_FBW7_PATHWAY                                                               | 9   | 0.61578  | 0.013985 | 0.23979  | 0.005119 | 0.858227 |
| REACTOME_DISEASES_ASSOCIATED_WITH_VISUAL_TRANSDUCTION                               | 11  | 0.61032  | 0.015323 | 0.23856  | 0.005264 | 0.858227 |
| CO_KINASE_ACTIVITY                                                                  | 683 | 0.076598 | 0.014859 | 0.029945 | 0.00527  | 0.858227 |
| CO_RESPONSE_TO_ACTIVITY                                                             | 58  | 0.2776   | 0.015982 | 0.10869  | 0.005329 | 0.858227 |
| REACTOME_RHO_GTPASES_ACTIVATE_KTN1                                                  | 11  | 0.6173   | 0.015498 | 0.242    | 0.005379 | 0.858227 |
| CO_OXIDOREDUCTASE_ACTIVITY_OXIDIZING_METAL_IONS                                     | 14  | 0.47734  | 0.013519 | 0.18725  | 0.005404 | 0.858227 |
| REACTOME_DEGRADATION_OF_GLI1_BY_THE_PROTEASOME                                      | 56  | 0.27832  | 0.015746 | 0.10923  | 0.005421 | 0.858227 |
| CO_ANTIGEN_PROCESSING_AND_PRESENTATION_OF_EXOGENOUS_PEPTIDE_ANTIGEN_VIA_MHC_CLASS_I | 70  | 0.23956  | 0.015147 | 0.094059 | 0.005438 | 0.858227 |
| CO_PROTOPORPHYRINOGEN_IX_BIOSYNTHETIC_PROCESS                                       | 8   | 0.60191  | 0.012889 | 0.23658  | 0.005531 | 0.858227 |
| CO_ENDODERM_FORMATION                                                               | 48  | 0.31449  | 0.016478 | 0.12376  | 0.005531 | 0.858227 |
| CO_REGULATION_OF_PRESYNAPTIC_MEMBRANE_POTENTIAL                                     | 7   | 0.74957  | 0.015014 | 0.29567  | 0.005625 | 0.858227 |
| CO_ATP_HYDROLYSIS_COUPLED_TRANSMEMBRANE_TRANSPORT                                   | 28  | 0.38536  | 0.015429 | 0.15214  | 0.005661 | 0.858227 |
| CO_RESPONSE_TO_DEFENSES_OF_OTHER_ORGANISM_INVOLVED_IN_SYMBIOTIC_INTERACTION         | 5   | 0.92351  | 0.015635 | 0.36497  | 0.005702 | 0.858227 |
| CO_SULFUR_AMINO_ACID_METABOLIC_PROCESS                                              | 16  | 0.48698  | 0.014744 | 0.19293  | 0.005804 | 0.858227 |
| CO_METHIONINE_METABOLIC_PROCESS                                                     | 6   | 0.76625  | 0.01421  | 0.30367  | 0.005817 | 0.858227 |
| CO_REGULATION_OF_TRANPOSITION                                                       | 20  | 0.45624  | 0.015441 | 0.18087  | 0.005832 | 0.858227 |
| CO_CELULAR_RESPONSE_TO_INSULIN LIKE_GROWTH_FACTOR_STIMULUS                          | 8   | 0.61966  | 0.013269 | 0.24617  | 0.00592  | 0.858227 |
| CO_STEM_CELL_DIFFERENTIATION                                                        | 234 | 0.13568  | 0.015611 | 0.053904 | 0.00592  | 0.858227 |
| CO_CYCLASE_ACTIVITY                                                                 | 17  | 0.48333  | 0.015083 | 0.19295  | 0.006129 | 0.858227 |
| CO_PHOTORECEPTOR_CELL_DEVELOPMENT                                                   | 9   | 0.30525  | 0.015313 | 0.12189  | 0.006139 | 0.858227 |
| CO_REGULATION_OF_DOPAMINERGIC_NEURON_DIFFERENTIATION                                | 9   | 0.63943  | 0.014522 | 0.25581  | 0.006221 | 0.858227 |
| CO_MAP_KINASE_KINASE_KINASE_ACTIVITY                                                | 24  | 0.38086  | 0.014119 | 0.15309  | 0.006432 | 0.858227 |
| CO_LONG_CHAIN_FATTY_ACYL_COA_BINDING                                                | 6   | 0.68603  | 0.012722 | 0.27638  | 0.006534 | 0.858227 |
| CO_PROTEIN_SULFATION                                                                | 8   | 0.76654  | 0.016414 | 0.31024  | 0.006746 | 0.858227 |
| REACTOME_RHO_GTPASE_EFFECTORS                                                       | 274 | 0.11916  | 0.014818 | 0.048355 | 0.006869 | 0.858227 |
| CO_NEURAL_TUBE_FORMATION                                                            | 98  | 0.20251  | 0.015138 | 0.082219 | 0.006894 | 0.858227 |
| CO_ESTABLISHMENT_OF_MEIOTIC_SPINDLE_LOCALIZATION                                    | 5   | 0.7467   | 0.012641 | 0.30317  | 0.006895 | 0.858227 |
| CO_CILIUM_OR_FLAGELLUM_DEPENDENT_CELL_MOTILITY                                      | 35  | 0.33098  | 0.014812 | 0.13446  | 0.006923 | 0.858227 |
| REACTOME_CREB3_FACTORS_ACTIVATE_GENES                                               | 8   | 0.71555  | 0.015322 | 0.29104  | 0.006979 | 0.858227 |
| CO_JUN_KINASE_KINASE_KINASE_ACTIVITY                                                | 8   | 0.62919  | 0.013473 | 0.25594  | 0.006984 | 0.858227 |
| CO_HOMOCYSTEINE_METABOLIC_PROCESS                                                   | 11  | 0.53386  | 0.013403 | 0.21781  | 0.007127 | 0.858227 |
| CO_REGULATION_OF_RESTING_MEMBRANE_POTENTIAL                                         | 8   | 0.66549  | 0.01425  | 0.27195  | 0.007206 | 0.858227 |
| CO_ACTIVATION_OF_JUN_KINASE_ACTIVITY                                                | 35  | 0.31176  | 0.013952 | 0.12743  | 0.007217 | 0.858227 |
| CO_CYCLIC_NUCLEOTIDE_BIOSYNTHETIC_PROCESS                                           | 18  | 0.45913  | 0.014743 | 0.18785  | 0.007264 | 0.858227 |
| CO_CELULAR_SODIUM_ION_HOMEOSTASIS                                                   | 16  | 0.49372  | 0.014948 | 0.20213  | 0.007296 | 0.858227 |
| REACTOME_SYNDECAN_INTERACTIONS                                                      | 26  | 0.3798   | 0.014654 | 0.15583  | 0.007405 | 0.858227 |
| CO_ENERGY_COUPLED_PROTON_TRANSMEMBRANE_TRANSPORT_AGAINST_ELECTROCHEMICAL_GRADIENT   | 26  | 0.37412  | 0.014435 | 0.15361  | 0.007441 | 0.858227 |
| CO_RETINOL_BINDING                                                                  | 14  | 0.46357  | 0.013129 | 0.1905   | 0.007485 | 0.858227 |
| CO_MONONUCLEAR_CELL_DIFFERENTIATION                                                 | 33  | 0.34626  | 0.015048 | 0.14247  | 0.007546 | 0.858227 |
| REACTOME_FGFR1_MEDIATED_NE_KB_ACTIVATION                                            | 74  | 0.23229  | 0.015099 | 0.095611 | 0.007565 | 0.858227 |

|                                                                                    |     |          |          |          |          |           |
|------------------------------------------------------------------------------------|-----|----------|----------|----------|----------|-----------|
| CO_MICROVESICLE                                                                    | 3   | 1.1665   | 0.015299 | 0.4805   | 0.007601 | 0.8588227 |
| CO_COMPLEMENT_RECEPTOR_MEDIATED_SIGNALING_PATHWAY                                  | 10  | 0.6893   | 0.016501 | 0.2851   | 0.007814 | 0.8588227 |
| PID_AR_PATHWAY                                                                     | 57  | 0.2512   | 0.014337 | 0.1041   | 0.007916 | 0.8588227 |
| CO_HOMOSENSORY_METABOLIC_PROCESS                                                   | 4   | 0.94177  | 0.014261 | 0.39147  | 0.008077 | 0.8588227 |
| CO_MECHANOSENSORY_BEHAVIOR                                                         | 15  | 0.48309  | 0.014162 | 0.20114  | 0.008164 | 0.8588227 |
| CO_HEMATOPOIETIC_STEM_CELL_DIFFERENTIATION                                         | 74  | 0.22052  | 0.014334 | 0.091822 | 0.008168 | 0.8588227 |
| CO_PROTEIN_PRENILTRANSFERASE_ACTIVITY                                              | 6   | 0.74823  | 0.013876 | 0.31182  | 0.008214 | 0.8588227 |
| CO_SODIUM_ION_EXPORT_ACROSS_PLASMA_MEMBRANE                                        | 14  | 0.52078  | 0.014749 | 0.21177  | 0.008247 | 0.8588227 |
| CO_PHOTOTRANSDUCTION                                                               | 50  | 0.24261  | 0.012972 | 0.10118  | 0.00825  | 0.8588227 |
| REACTOME_MITOCHONDRIAL_FATTY_ACID_BETA_OXIDATION_OF_UNSATURATED_FATTY_ACIDS        | 6   | 0.60073  | 0.011141 | 0.25057  | 0.00826  | 0.8588227 |
| CO_OXIDOREDUCTASE_ACTIVITY_ACTING_ON_THE_CH_CH_GROUP_OF_DONORS                     | 57  | 0.24732  | 0.014116 | 0.10321  | 0.008286 | 0.8588227 |
| REACTOME_CELLULAR_RESPONSES_TO_EXTERNAL_STIMULI                                    | 472 | 0.08636  | 0.014014 | 0.23612  | 0.008307 | 0.8588227 |
| BIOCARTA_SKPEZE_PATHWAY                                                            | 10  | 0.55355  | 0.013251 | 0.23122  | 0.008337 | 0.8588227 |
| CO_WIDE_PORE_CHANNEL_ACTIVITY                                                      | 17  | 0.47523  | 0.01483  | 0.19868  | 0.008384 | 0.8588227 |
| REACTOME_THE_ROLE_OF_NEF_IN_HIV_1_REPLICATION_AND_DISEASE_PATHOGENESIS             | 27  | 0.31593  | 0.012421 | 0.13211  | 0.008399 | 0.8588227 |
| CO_POSITIVE_REGULATION_OF_MICROGIAL_CELL_MIGRATION                                 | 5   | 0.72583  | 0.012288 | 0.30399  | 0.008484 | 0.8588227 |
| CO_UBIQUITIN_CONJUGATING_ENZYME_BINDING                                            | 30  | 0.34867  | 0.014449 | 0.14606  | 0.008495 | 0.8588227 |
| CO_NUCLEOTIDE_TRANSMEMBRANE_TRANSPORTER_ACTIVITY                                   | 16  | 0.4296   | 0.013971 | 0.18007  | 0.00853  | 0.8588227 |
| CO_POSITIVE_REGULATION_OF_CHROMATIN_BINDING                                        | 12  | 0.5328   | 0.013971 | 0.22451  | 0.008824 | 0.875595  |
| CO_ASTROCYTE_CELL_MIGRATION                                                        | 8   | 0.65265  | 0.013975 | 0.27525  | 0.008872 | 0.875595  |
| CO_MRNA_3_END_PROCESSING                                                           | 91  | 0.19053  | 0.013727 | 0.08042  | 0.008919 | 0.875595  |
| CO_BRAIN_DERIVED_NEUROTROPHIC_FACTOR_RECEPTOR_SIGNALING_PATHWAY                    | 5   | 0.95055  | 0.016093 | 0.4027   | 0.009133 | 0.889452  |
| CO_NEURAL_PLATE_PATTERN_SPECIFICATION                                              | 7   | 0.74438  | 0.01491  | 0.3166   | 0.009364 | 0.901003  |
| CO_ATP_TRANSPORT                                                                   | 9   | 0.58303  | 0.013241 | 0.24824  | 0.009426 | 0.901003  |
| CO_NEGATIVE_REGULATION_OF_CELL_CYCLE_PROCESS                                       | 301 | 0.10765  | 0.014019 | 0.045982 | 0.00962  | 0.901003  |
| CO_PROTEIN_GERANYLGERANYLTRANSFERASE_ACTIVITY                                      | 4   | 0.92351  | 0.013984 | 0.39538  | 0.009759 | 0.901003  |
| CO_PLASMA_LIPOPROTEIN_PARTICLE_CLEARANCE                                           | 52  | 0.25772  | 0.014051 | 0.11053  | 0.009865 | 0.901003  |
| CO_POSITIVE_REGULATION_OF_PROTEIN_BINDING                                          | 86  | 0.18313  | 0.012828 | 0.079313 | 0.010479 | 0.901003  |
| CO_SCF_UBIQUITIN_LIGASE_COMPLEX                                                    | 56  | 0.23562  | 0.01333  | 0.1023   | 0.010637 | 0.901003  |
| REACTOME_SYNTHESIS_OF_PG                                                           | 8   | 0.61006  | 0.013063 | 0.26489  | 0.010645 | 0.901003  |
| REACTOME_SWITCHING_OF_ORIGINS_TO_A_POST_REPLICATIVE_STATE                          | 83  | 0.20431  | 0.014061 | 0.088761 | 0.01068  | 0.901003  |
| CO_GAP_JUNCTION_CHANNEL_ACTIVITY                                                   | 10  | 0.62132  | 0.014874 | 0.26996  | 0.01088  | 0.901003  |
| REACTOME_FBXW7_MUTANTS_AND_NOTCH1_IN_CANCER                                        | 5   | 0.87556  | 0.014823 | 0.38119  | 0.010818 | 0.901003  |
| CO_GLYCOSYL_COMPOUND_CATABOLIC_PROCESS                                             | 37  | 0.31357  | 0.014428 | 0.13655  | 0.010832 | 0.901003  |
| CO_INOSITOL_PHOSPHATE_CATABOLIC_PROCESS                                            | 15  | 0.41476  | 0.012159 | 0.18066  | 0.010849 | 0.901003  |
| CO_RESPONSE_TO_AUDITORY_STIMULUS                                                   | 22  | 0.35351  | 0.012548 | 0.15414  | 0.010917 | 0.901003  |
| CO_CALCIIUM_SODIUM_ANTIPORTER_ACTIVITY                                             | 5   | 0.81756  | 0.013841 | 0.35651  | 0.010925 | 0.901003  |
| REACTOME_CDK_MEDIATED_PHOSPHORYLATION_AND_REMOVAL_OF_CDC6                          | 66  | 0.2216   | 0.013607 | 0.096992 | 0.011171 | 0.901003  |
| REACTOME_CELLULAR_RESPONSES_TO_STRESS                                              | 385 | 0.089411 | 0.013137 | 0.039228 | 0.011332 | 0.901003  |
| CO_REGULATION_OF_PROTEIN_LOCALIZATION_TO_CELL_PERIPHERY                            | 117 | 0.16057  | 0.013107 | 0.070528 | 0.011411 | 0.901003  |
| CO_REGULATION_OF_PROTEIN_LOCALIZATION_TO_CELL_PERIPHERY                            | 103 | 0.16744  | 0.01283  | 0.073598 | 0.011457 | 0.901003  |
| CO_PHOSPHOLIPASE_A1_ACTIVITY                                                       | 4   | 1.1305   | 0.017118 | 0.49754  | 0.011547 | 0.901003  |
| REACTOME_FORMATION_OF_THE_BETA_CATENIN_TCF_TRANSACTIVATING_COMPLEX                 | 68  | 0.22978  | 0.01432  | 0.10128  | 0.011649 | 0.901003  |
| CO_RNA_DIRECTED_DNA_POLYMERASE_ACTIVITY                                            | 5   | 0.63632  | 0.010773 | 0.28048  | 0.011649 | 0.901003  |
| CO_TELOMERASE_ACTIVITY                                                             | 5   | 0.63632  | 0.010773 | 0.28048  | 0.011649 | 0.901003  |
| CO_RESPONSE_TO_IMMUNE_RESPONSE_OF_OTHER_ORGANISM_INVOLVED_IN_SYMBIOTIC_INTERACTION | 3   | 1.1187   | 0.014671 | 0.49324  | 0.011671 | 0.901003  |
| CO_REGULATION_OF_PROTEIN_LOCALIZATION_TO_PLASMA_MEMBRANE                           | 87  | 0.1791   | 0.012618 | 0.078975 | 0.011676 | 0.901003  |
| REACTOME_DEGRADATION_OF_DVL                                                        | 64  | 0.2476   | 0.013628 | 0.10931  | 0.011676 | 0.901003  |
| REACTOME_REGULATION_OF_PTEIN_STABILITY_AND_ACTIVITY                                | 53  | 0.23314  | 0.014097 | 0.10311  | 0.011882 | 0.901003  |
| CO_SULFUR_AMINO_ACID_CATABOLIC_PROCESS                                             | 9   | 0.56707  | 0.012879 | 0.25148  | 0.012077 | 0.901003  |
| CO_NEGATIVE_REGULATION_OF_EXTRACELLULAR_MATRIX_ORGANIZATION                        | 10  | 0.63759  | 0.015263 | 0.28325  | 0.0122   | 0.901003  |
| REACTOME_TENSD1_CLEAVES_PEROXISOMAL_PROTEINS                                       | 34  | 0.30196  | 0.01332  | 0.13436  | 0.012312 | 0.901003  |
| CO_POSITIVE_REGULATION_OF_DOUBLE_STRAND_BREAK_REPAIR_VIA_NONHOMOLOGOUS_ENDJOINING  | 7   | 0.60931  | 0.012205 | 0.27116  | 0.012326 | 0.901003  |
| CO_POSITIVE_REGULATION_OF_DOUBLE_STRAND_BREAK_REPAIR                               | 8   | 0.61978  | 0.013271 | 0.27591  | 0.012248 | 0.901003  |
| CO_POSITIVE_REGULATION_OF_DOUBLE_STRAND_BREAK_REPAIR                               | 22  | 0.37763  | 0.013404 | 0.16813  | 0.012357 | 0.901003  |





## Supplemental Figures

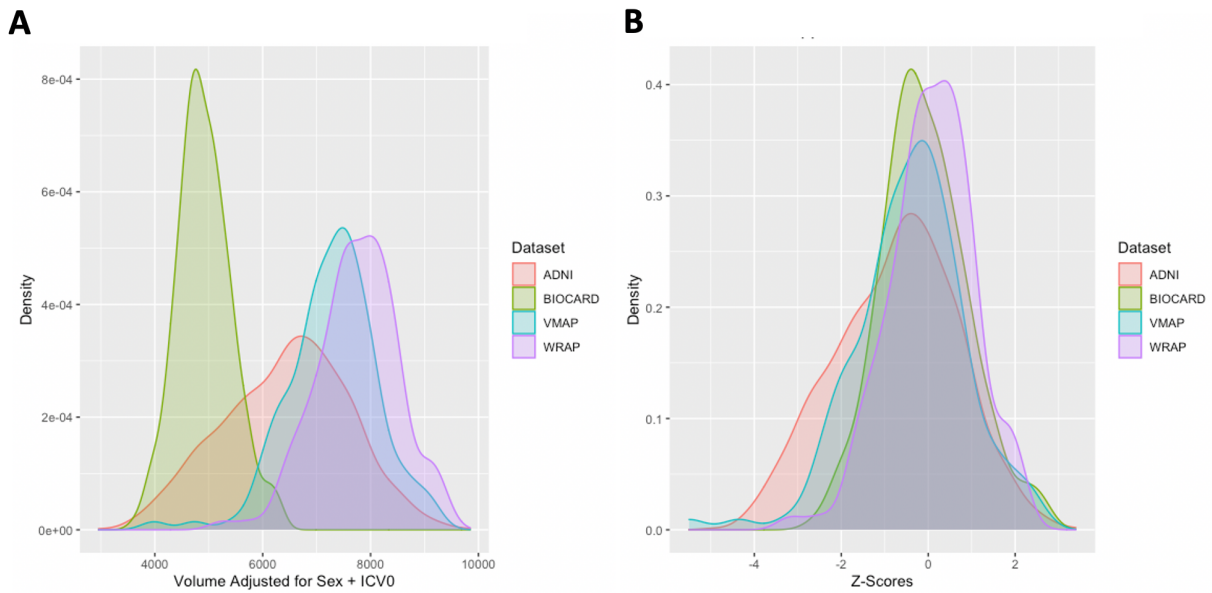

**Supplemental Figure 1. Density plots of hippocampal volume distribution pre- and post-standardization per study.** The plots are colored by dataset for visualization. The density is presented on the y-axis. **A)** Pre-standardized distribution of hippocampal volumes adjusted for sex and intracranial volume (in mm<sup>3</sup>). **B)** Distribution of hippocampal volume Z-scores after standardization. All measures were centered and standardized using the mean and standard deviation of adjusted hippocampal volumes of cognitively normal participants.

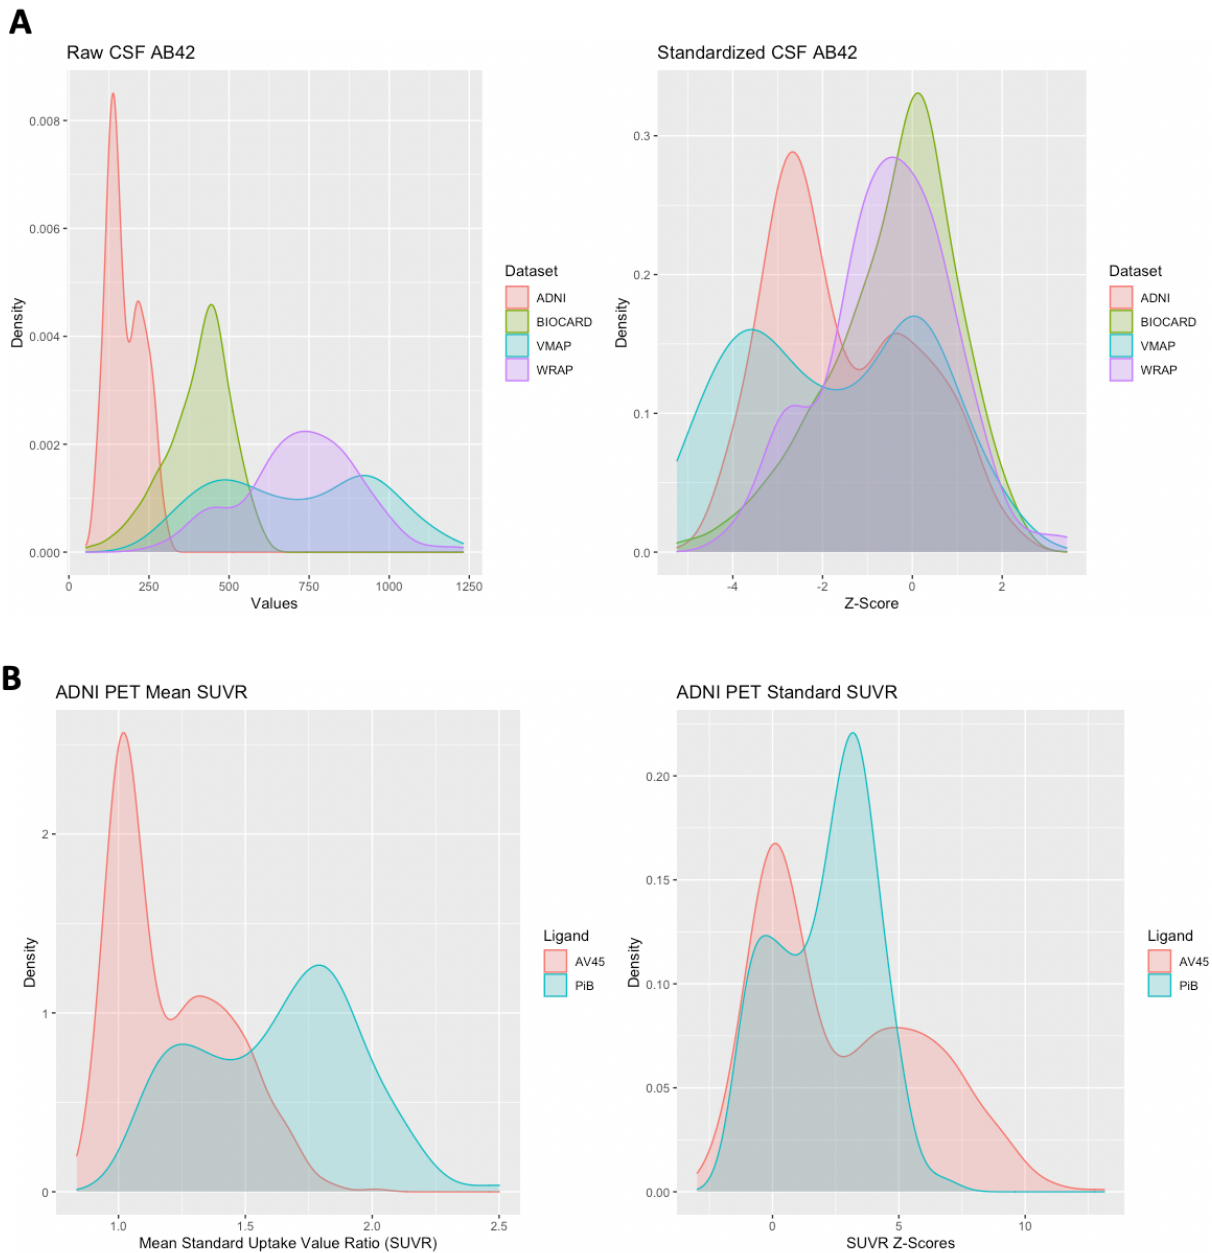

**Supplementary Figure 2. Density plots of normalized amyloid measures.** All measures were centered and standardized using the mean and standard deviation of the amyloid negative gaussian distribution within study from a mixture model. **A)** Density plot of raw CSF A $\beta$ -42 values colored by dataset (left). Density plot after harmonization (right), where the x-axis represents Z-scores. **B)** Left and right panels represent amyloid PET standard uptake value ratios pre- and post- harmonization. These density plots are colored by ligand.

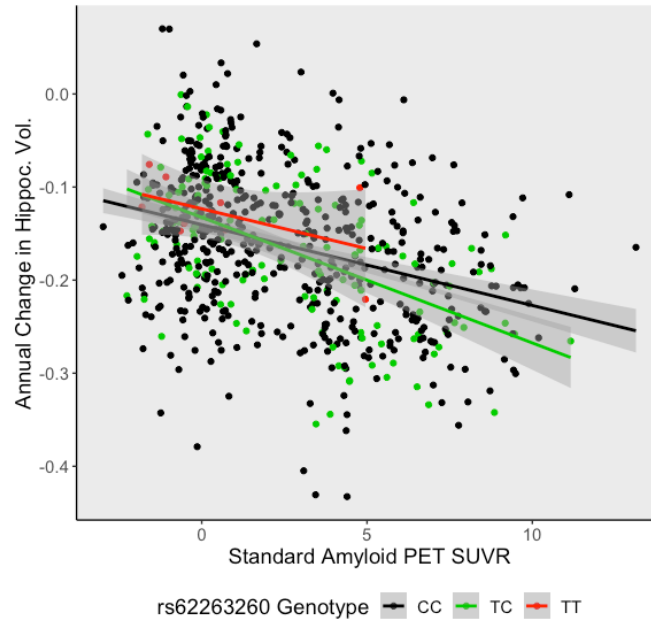

**Supplemental Figure 3. A plot demonstrating how the index SNP, rs62263260, modifies the association between standardized baseline PET amyloid levels and hippocampal atrophy in ADNI.** The y-axis represents baseline standardized hippocampal volume, and the x-axis represents standardized amyloid PET SUVRs of A $\beta$ -42. Points and lines are color coded by genotype, where rs62263260-T heterozygotes are denoted by the green line and homozygotes (TT) are red.

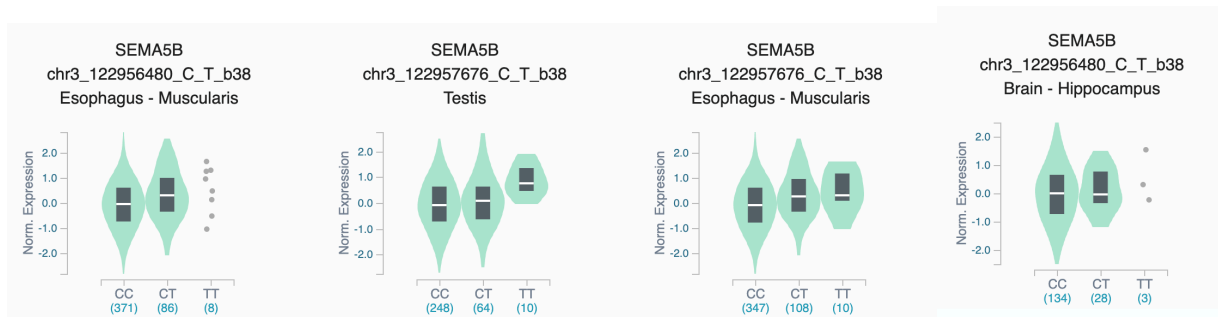

**Supplemental Figure 4. Violin plots adapted from the NIH Gene-Tissue Expression (GTEx) Project showing the normalized expression of *SEMA5B* in esophageal, testicular, and brain tissue.** The plots suggest that the minor alleles of rs62263260 and rs10934626, a SNP in the same locus, are associated with an increase in Semaphorin 5B expression, especially in homozygotes. These images were obtained from the GTEx Portal on 06/15/20. In addition, the given rs62263260 *SEMA5B* eQTL beta from Sieberts et al., 2020 is  $\beta = 0.318$ . The expression increasing allele is rs62263260-T, the minor allele.<sup>18</sup>

## References

1. Jefferson AL, Gifford KA, Acosta LMY, Bell SP, Donahue MJ, Taylor Davis L *et al.* The Vanderbilt Memory & Aging Project: Study Design and Baseline Cohort Overview. *Journal of Alzheimer's Disease* 2016; (Preprint): 1-20.
2. Johnson SC, Kosciak RL, Jonaitis EM, Clark LR, Mueller KD, Berman SE *et al.* The Wisconsin Registry for Alzheimer's Prevention: A review of findings and current directions. *Alzheimer & Dementia: DADM* 2018; **10**: 130-142.
3. Moghekar A, Li S, Lu Y, Li M, Wang M-C, Albert M *et al.* CSF biomarker changes precede symptom onset of mild cognitive impairment. *Neurology* 2013; **81**(20): 1753-1758.
4. Roberts RO, Geda YE, Knopman DS, Cha RH, Pankratz VS, Boeve BF *et al.* The Mayo Clinic Study of Aging: design and sampling, participation, baseline measures and sample characteristics. *Neuroepidemiology* 2008; **30**(1): 58-69.
5. Ramanan VK, Wang X, Przybelski SA, Raghavan S, Heckman MG, Batzler A *et al.* Variants in PPP2R2B and IGF2BP3 are associated with higher tau deposition. *Brain Communications* 2020; **2**(2).
6. Ruigrok ANV, Salimi-Khorshidi G, Lai M-C, Baron-Cohen S, Lombardo MV, Tait RJ *et al.* A meta-analysis of sex differences in human brain structure. *Neuroscience & Biobehavioral Reviews* 2014; **39**: 34-50.
7. Ramanan VK, Lesnick TG, Przybelski SA, Heckman MG, Knopman DS, Graff-Radford J *et al.* Coping with brain amyloid: genetic heterogeneity and cognitive resilience to Alzheimer's pathophysiology. *Acta Neuropathol Commun* 2021; **9**(1): 48.
8. Ashburner M, Ball CA, Blake JA, Botstein D, Butler H, Cherry JM *et al.* Gene ontology: tool for the unification of biology. The Gene Ontology Consortium. *Nature genetics* 2000; **25**(1): 25-29.
9. Kanehisa M, Furumichi M, Tanabe M, Sato Y, Morishima K. KEGG: new perspectives on genomes, pathways, diseases and drugs. *Nucleic Acids Research* 2017; **45**(D1): D353-D361.
10. Kanehisa M, Sato Y, Kawashima M, Furumichi M, Tanabe M. KEGG as a reference resource for gene and protein annotation. *Nucleic acids research* 2016; **44**(D1): D457-D462.
11. Ogata H, Goto S, Sato K, Fujibuchi W, Bono H, Kanehisa M. KEGG: Kyoto Encyclopedia of Genes and Genomes. *Nucleic acids research* 1999; **27**(1): 29-34.

12. Croft D, O'Kelly G, Wu G, Haw R, Gillespie M, Matthews L *et al.* Reactome: a database of reactions, pathways and biological processes. *Nucleic acids research* 2011; **39**(Database issue): D691-D697.
13. Fabregat A, Sidiropoulos K, Garapati P, Gillespie M, Hausmann K, Haw R *et al.* The Reactome pathway Knowledgebase. *Nucleic acids research* 2016; **44**(D1): D481-D487.
14. Nishimura D. BioCarta. *Biotech Software & Internet Report* 2001; **2**(3): 117-120.
15. Schaefer CF, Anthony K, Krupa S, Buchoff J, Day M, Hannay T *et al.* PID: the Pathway Interaction Database. *Nucleic acids research* 2009; **37**(Database issue): D674-D679.
16. Hunt JFV, Buckingham W, Kim AJ, Oh J, Vogt NM, Jonaitis EM *et al.* Association of Neighborhood-Level Disadvantage With Cerebral and Hippocampal Volume. *JAMA Neurol* 2020; **77**(4): 451-460.
17. Pettigrew C, Soldan A, Zhu Y, Wang M-C, Brown T, Miller M *et al.* Cognitive reserve and cortical thickness in preclinical Alzheimer's disease. *Brain Imaging Behav* 2017; **11**(2): 357-367.
18. Sieberts SK, Perumal TM, Carrasquillo MM, Allen M, Reddy JS, Hoffman GE *et al.* Large eQTL meta-analysis reveals differing patterns between cerebral cortical and cerebellar brain regions. *Scientific Data* 2020; **7**(1): 340.
